# Supplementary material for: Identification of fluorescently-barcoded nanoparticles using machine learning
Source: Royal Society of Chemistry journal article supplement (doi:10.1039/d2na00648k), 2023-01-01
Supplement: d2na00648k1.pdf [file d2na00648k1.pdf]

# Identification of fluorescently-barcoded nanoparticles using machine learning

Ana Ortiz-Perez <sup>\*1</sup>, Cristina Izquierdo-Lozano <sup>\*1</sup>, Rens Meijers<sup>1</sup>, Francesca Grisoni<sup>1</sup>, Lorenzo Albertazzi<sup>1</sup>

<sup>1</sup>Institute for Complex Molecular Systems (ICMS), Eindhoven University of technology, PO Box 513, 5600 MB Eindhoven, The Netherlands

## List of figures and tables

### PART 1 Characterization of dye encapsulation

- **Fig. S1.** Dye encapsulation and fluorescence emission evaluation with bulk spectrophotometry.
- **Fig. S2.** TIRF images of single DiI-loaded nanoparticles with 1, 10, 75 and 100  $\mu\text{M}$  of dye.
- **Fig. S3.** Influence of DiO concentration in nanoparticle properties.

### PART 2 Bulk physicochemical characterization of barcodes

- **Table S1.** Barcode bulk physicochemical characterization by Dynamic Light Scattering (DLS) and Nanoparticle Tracking Analysis (NTA).
- **Fig. S4.** Barcode bulk physicochemical characterization. by Dynamic Light Scattering (DLS) and Nanoparticle Tracking Analysis (NTA).
- **Fig. S5.** Bulk emission spectra of 26 barcodes excited with 488, 552 and 638 laser lines.

### PART 3 Single Nanoparticle optical characterization with Confocal Microscopy

- **Fig. S6.** Single nanoparticle optical characterization with confocal microscopy.
- **Fig. S7.** Comparison between bulk and single-particle fluorescence intensities for two intensity levels (1, 10  $\mu\text{M}$ ) of the same color (DiI).

### PART 4 Principal Components Analysis (PCA)

- **Fig. S8.** Different perspectives of the PCA plot for barcodes 1-26.

### PART 5 Machine learning

- **Table S2.** Overview of the unbalance in the dataset.
- **Table S3.** Classifiers trained and compared in the creation of the supervised machine-learning model.
- **Table S4.** Metrics used to assess the models and their formulas.
- **Table S5.** Scores of the different classifiers trained with the full dataset of 26 barcodes, sorted by higher accuracy first.
- **Table S6.** Scores of the different classifiers trained with the full dataset of 26 barcodes, sorted by higher accuracy first, using only the features extracted from the three main acquisitions channels ( $\alpha$ ,  $\beta$ ,  $\delta$ ).
- **Table S7.** Scores of the different classifiers trained with the 10-class model.
- **Fig. S9.** Feature importance plot of the second-best performing model, a Light Gradient Boosting Machine.
- **Fig. S10.** Accuracy according to dataset size.
- **Table S8.** Top-performance model, MLP classifier, hyperparameters before and after optimization.
- **Fig. S11.** y-scrambling analysis of the 10-class model.
- **Fig. S12.** Metrics per class for each of the 26 models trained to study the trade-off between accuracy and number of classes.
- **Table S9.** Model stability analysis.

## PART 1 Characterization of dye encapsulation

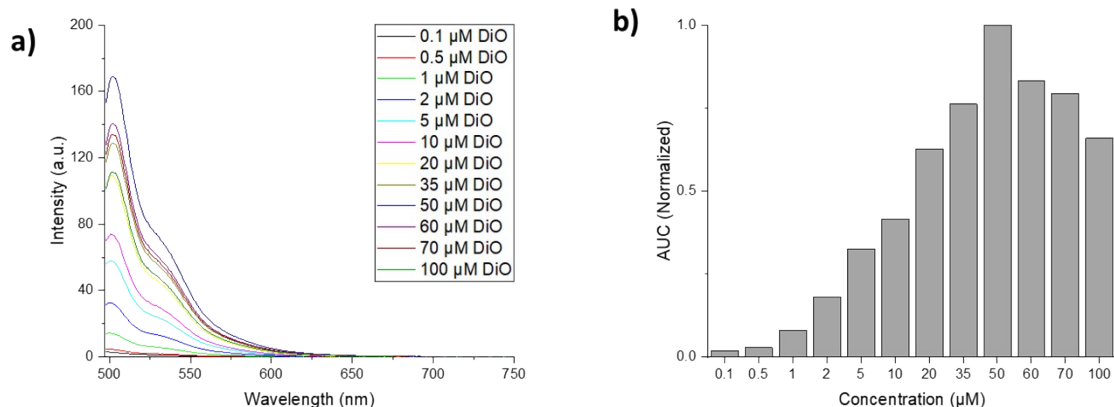

**Fig. S1.** Dye encapsulation and fluorescence emission evaluation with bulk spectrophotometry (a) DiO spectra of nanoparticles with concentrations ranging from 0.1  $\mu\text{M}$  to 100  $\mu\text{M}$  of DiO, (b) Quantification of fluorescence spectra as normalized area under the curve (AUC) of nanoparticles with concentration ranging from 0.1  $\mu\text{M}$  to 100  $\mu\text{M}$  of DiO.

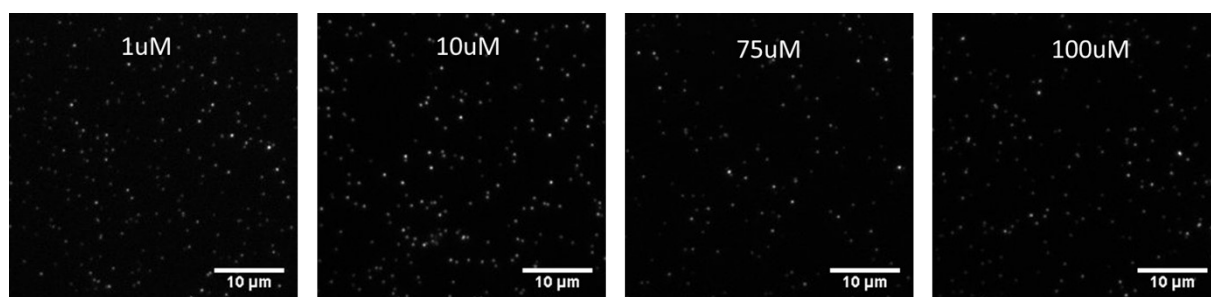

**Fig. S2.** Total internal reflection fluorescence (TIRF) images of single DiI-loaded nanoparticles with 1, 10, 75 and 100  $\mu\text{M}$  of dye. Optical parameters: 100x, 100 ms, 561 nm excitation at 2% laser power, TIRF angle 3930,0.

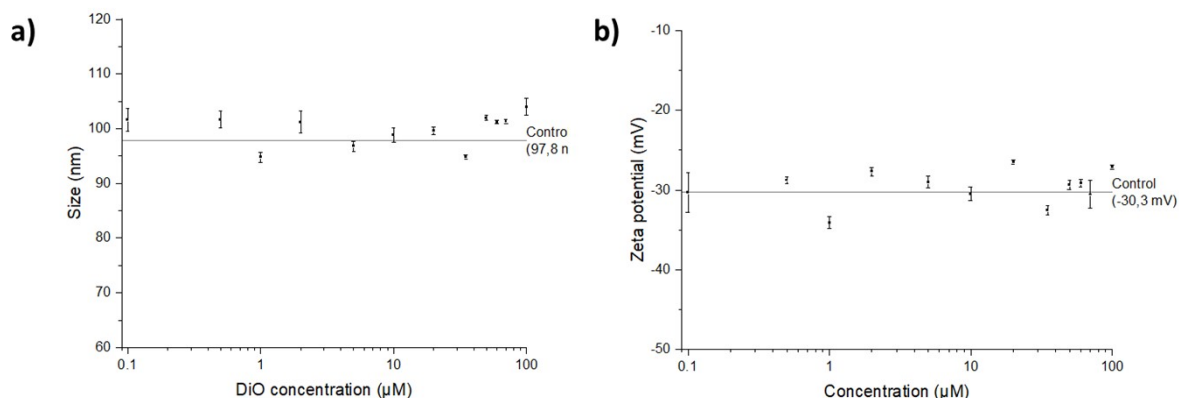

**Fig S3.** Influence of DiO concentration in nanoparticle properties: (a) size measured as hydrodynamic radius (Dynamic light scattering (DLS)) and (b) Z-potential. Three independent measurements, error bars displayed as standard deviation.

**PART 2      Bulk physicochemical characterization of barcodes****Table S1.** Barcode bulk physicochemical characterization by Dynamic Light Scattering (DLS) and Nanoparticle Tracking Analysis (NTA).

| Barcode | Zetasizer characterization/ DLS |      |      |      | Nanosight Characterization/ NTA |      |                         |                     |
|---------|---------------------------------|------|------|------|---------------------------------|------|-------------------------|---------------------|
|         | Z-average (nm)                  | SD   | PDI  | SD   | Size (nm)                       | SD   | NPs/ml *10 <sup>9</sup> | SE *10 <sup>9</sup> |
| 1       | 81.78                           | 0.49 | 0.08 | 0.01 | 99                              | 18.9 | 1.24                    | 0.0259              |
| 2       | 85.45                           | 0.49 | 0.08 | 0.01 | 102.4                           | 28.3 | 2.51                    | 0.0501              |
| 3       | 79.93                           | 0.40 | 0.07 | 0.01 | 99.5                            | 18.2 | 1.72                    | 0.0410              |
| 4       | 83.37                           | 0.43 | 0.06 | 0.01 | 100.5                           | 20.2 | 1.98                    | 0.0663              |
| 5       | 79.98                           | 0.71 | 0.07 | 0.02 | 97.2                            | 18.7 | 1.65                    | 0.035               |
| 6       | 82.43                           | 1.05 | 0.07 | 0.02 | 102.7                           | 29   | 1.48                    | 0.0612              |
| 7       | 77.24                           | 0.28 | 0.05 | 0.02 | 98.9                            | 19.2 | 1.45                    | 0.0231              |
| 8       | 80.98                           | 0.52 | 0.07 | 0.01 | 99                              | 25.4 | 2.21                    | 0.0264              |
| 9       | 78.20                           | 0.79 | 0.07 | 0.01 | 97.9                            | 20.7 | 1.67                    | 0.04                |
| 10      | 80.60                           | 0.70 | 0.06 | 0.02 | 98.5                            | 24.0 | 1.99                    | 0.0173              |
| 11      | 81.66                           | 0.88 | 0.07 | 0.02 | 99.2                            | 15.7 | 1.64                    | 0.822               |
| 12      | 85.13                           | 0.50 | 0.07 | 0.01 | 102.7                           | 21.4 | 1.91                    | 0.0483              |
| 13      | 81.55                           | 3.27 | 0.06 | 0.03 | 101.2                           | 17.8 | 1.42                    | 0.0277              |
| 14      | 86.94                           | 0.46 | 0.06 | 0.02 | 107                             | 20.0 | 1.18                    | 0.069               |
| 15      | 82.35                           | 0.40 | 0.08 | 0.01 | 100.4                           | 18.2 | 1.87                    | 0.0843              |
| 16      | 85.11                           | 1.04 | 0.07 | 0.02 | 100.9                           | 20.3 | 1.92                    | 0.0267              |
| 17      | 82.87                           | 0.59 | 0.06 | 0.01 | 103.9                           | 16.7 | 1.89                    | 0.0112              |
| 18      | 87.68                           | 0.95 | 0.05 | 0.02 | 99.4                            | 19.2 | 2                       | 0.0144              |
| 19      | 81.83                           | 0.53 | 0.08 | 0.01 | 98.9                            | 16.2 | 2.31                    | 0.0455              |
| 20      | 84.05                           | 0.28 | 0.06 | 0.02 | 98.6                            | 15.8 | 1.75                    | 0.0421              |
| 21      | 85.56                           | 0.67 | 0.07 | 0.02 | 102.1                           | 23.2 | 1.42                    | 0.0144              |
| 22      | 87.96                           | 0.87 | 0.06 | 0.02 | 101.3                           | 17.7 | 1.52                    | 0.0269              |
| 23      | 86.53                           | 0.57 | 0.07 | 0.01 | 102.8                           | 20   | 1.45                    | 0.0241              |
| 24      | 86.57                           | 1.30 | 0.07 | 0.02 | 102.7                           | 17.7 | 1.55                    | 0.0593              |
| 25      | 88.15                           | 0.63 | 0.06 | 0.01 | 107.3                           | 31.2 | 1.39                    | 0.0284              |
| 26      | 91.72                           | 1.25 | 0.08 | 0.02 | 103.5                           | 19.0 | 2                       | 0.0422              |

*PDI= poly dispersity index, NPs = Nanoparticles, SD= Standard Deviation, SE = Standard Error of the mean*

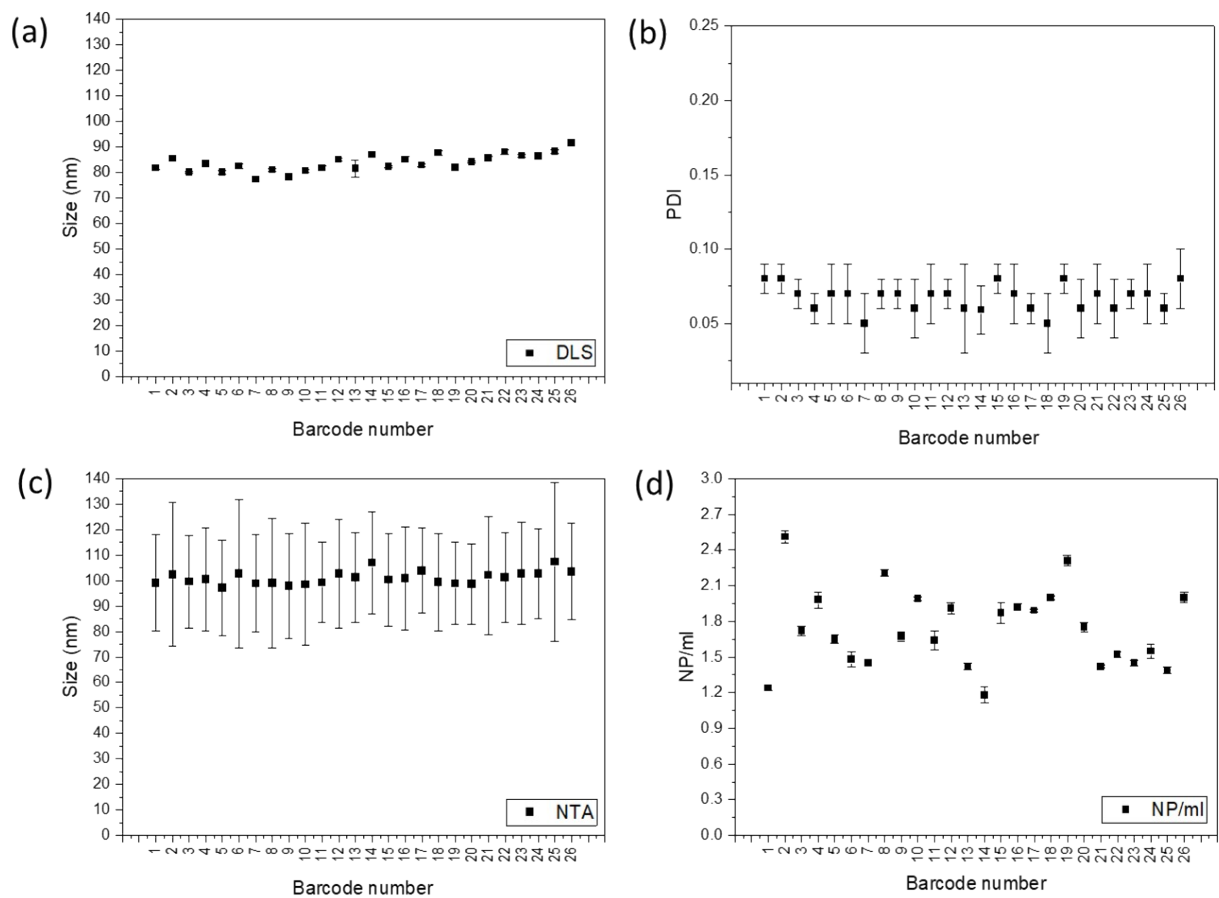

**Fig S4.** Barcode bulk physicochemical characterization by Dynamic Light Scattering (DLS) and Nanoparticle Tracking Analysis (NTA). (a) Mean diameter of 26 barcodes and DLS. (b) Polydispersity index (PDI) measured by DLS. Average of three measurements, error bars displayed as standard deviation (SD). (c) Mean diameter of 26 barcodes and (d) number concentration (NP/ml) estimated by NTA. Average of three measurements, errors displayed as standard deviation (SD) for the size and standard error of the mean (SE) for the number concentration .

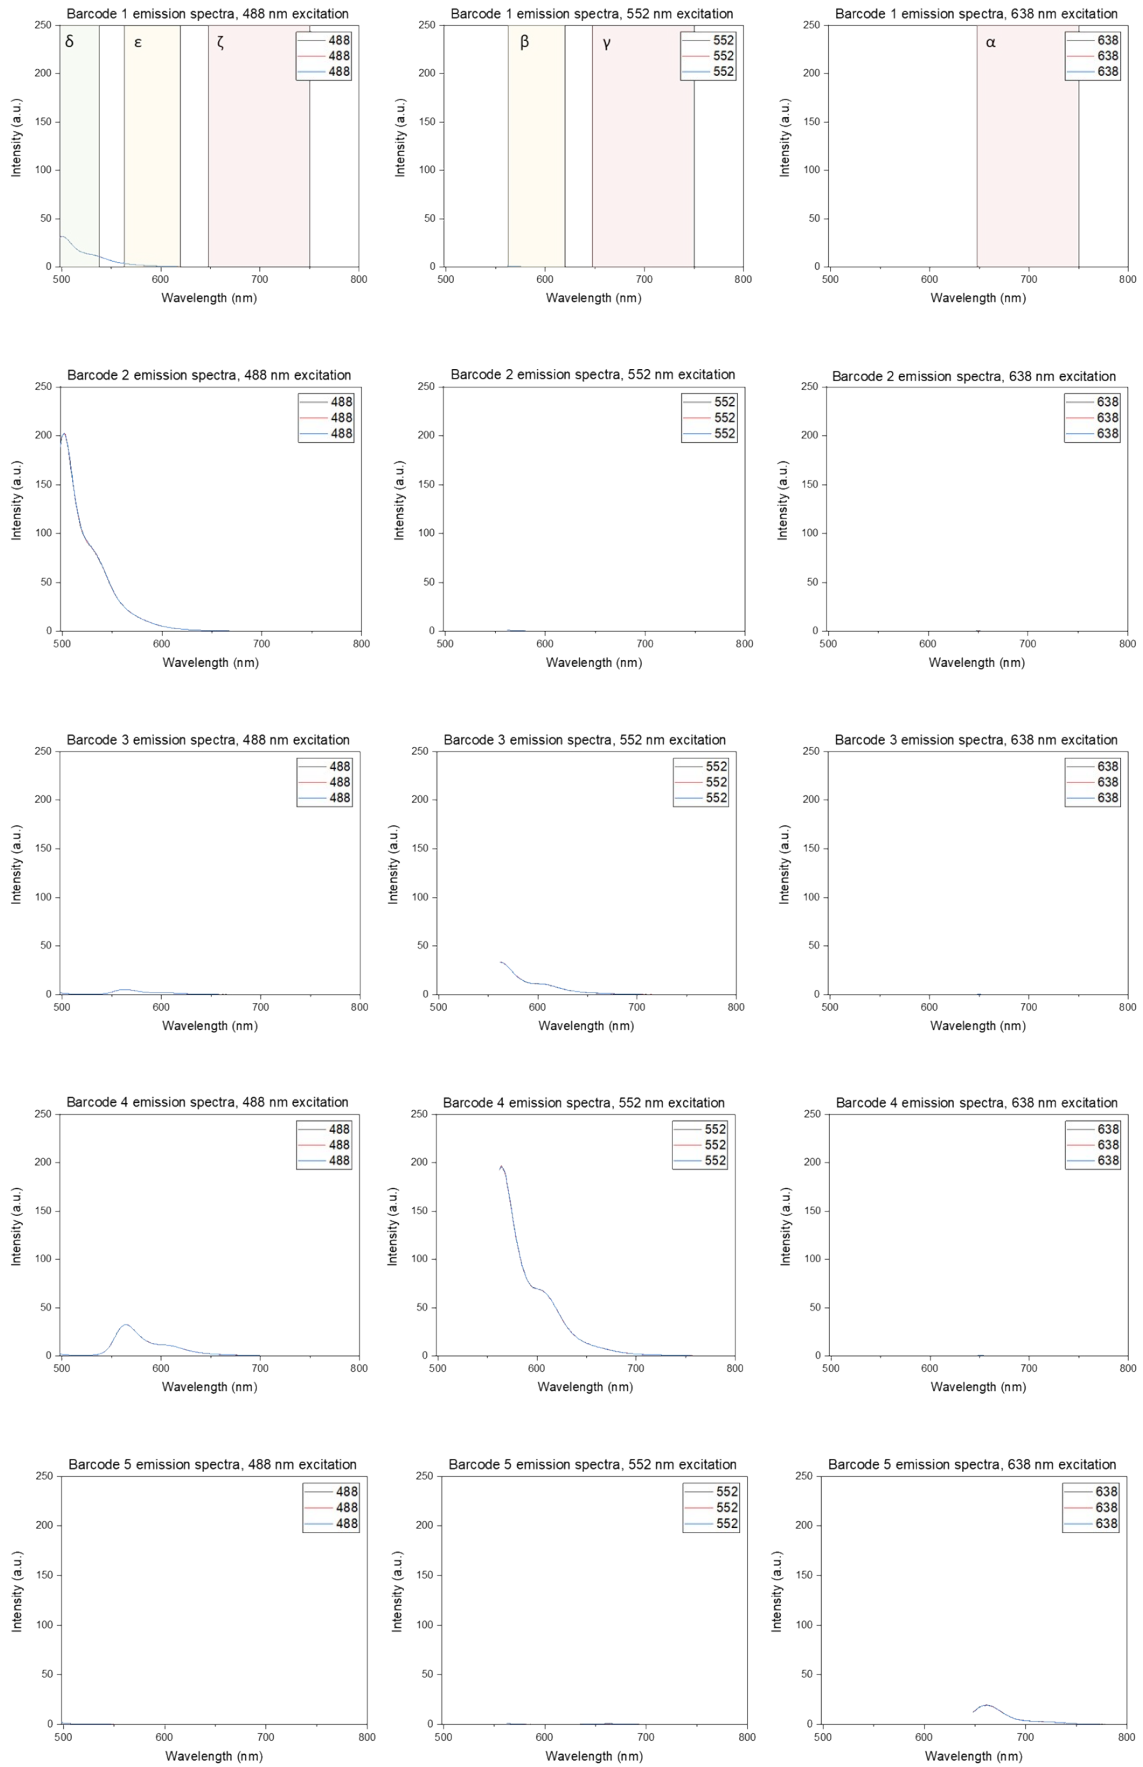

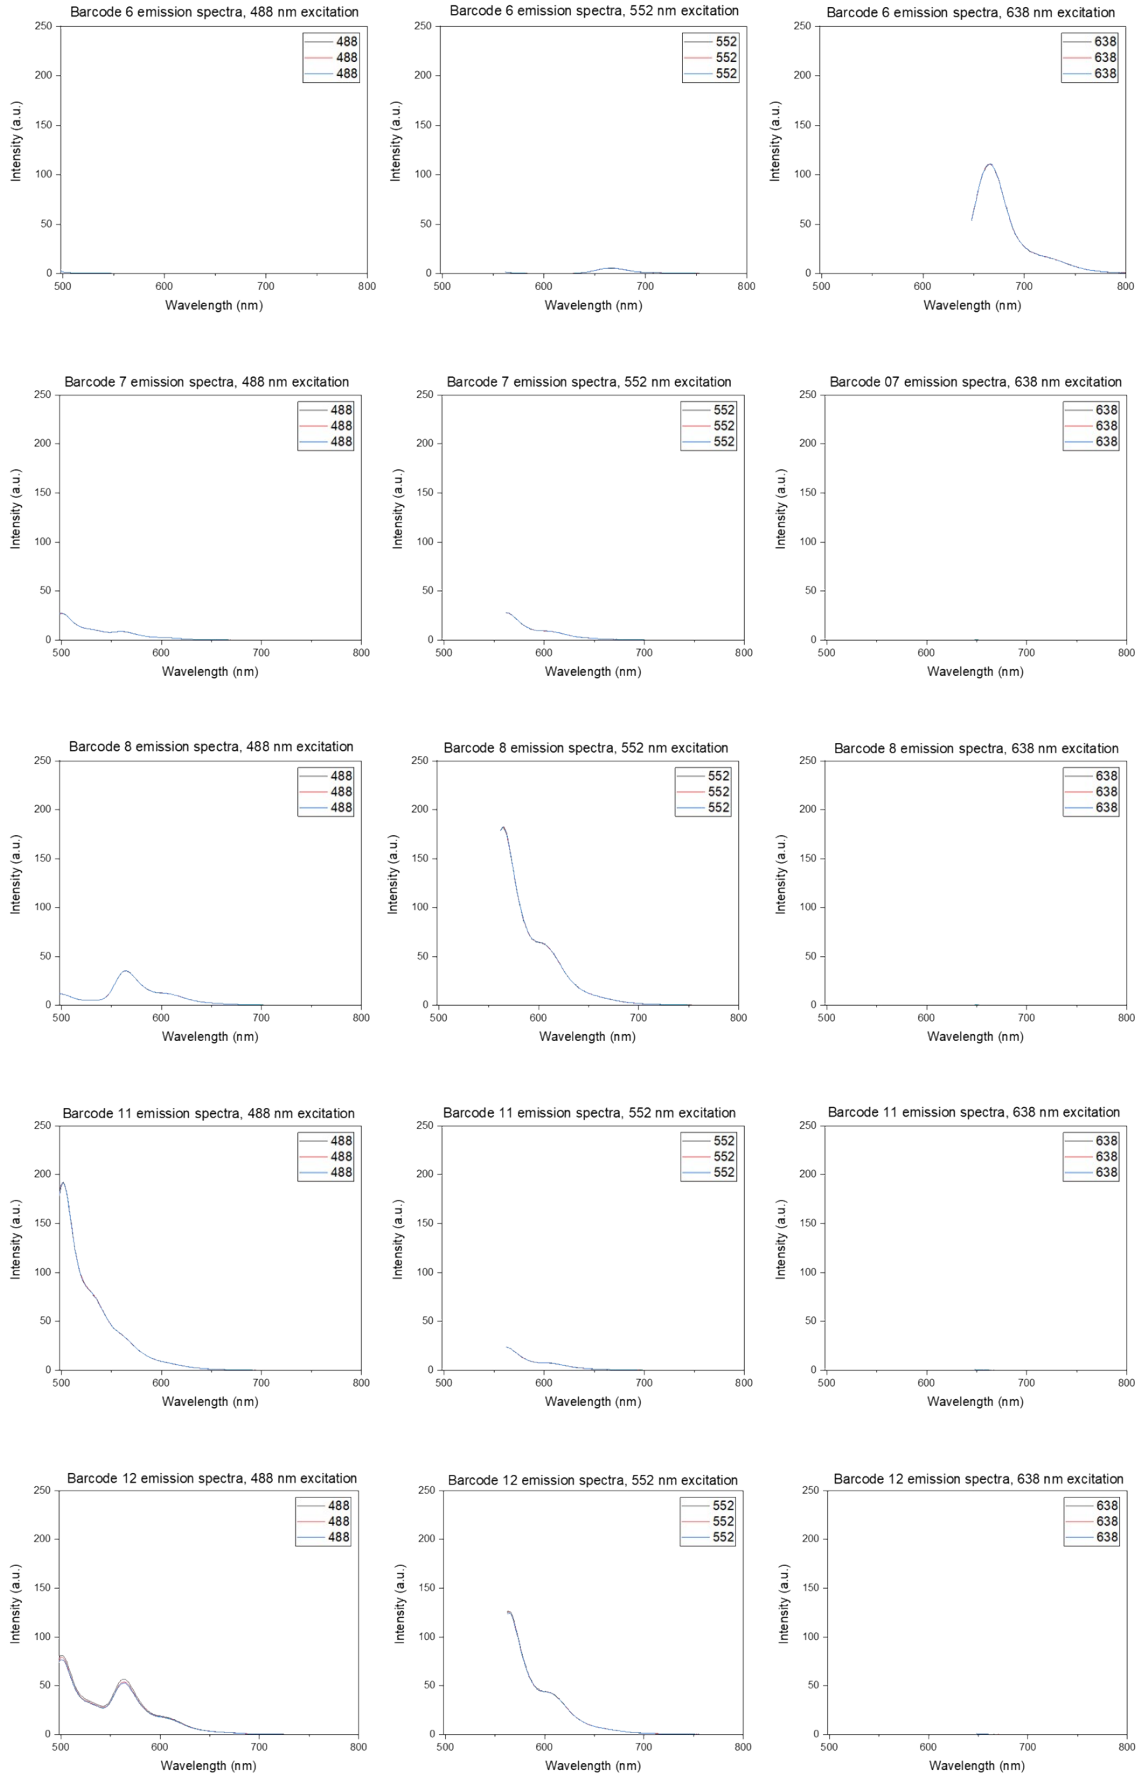



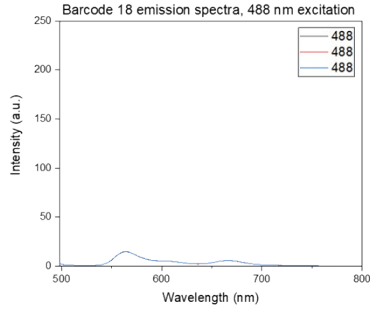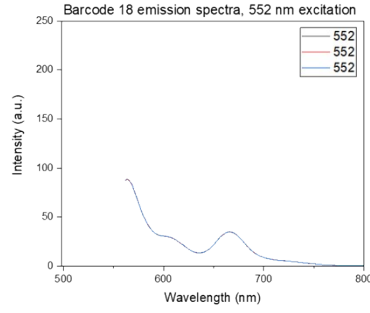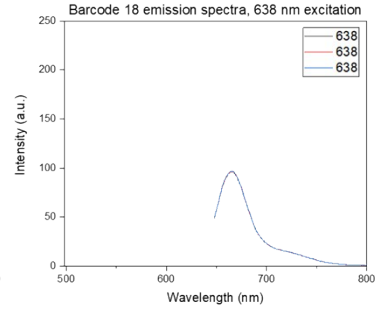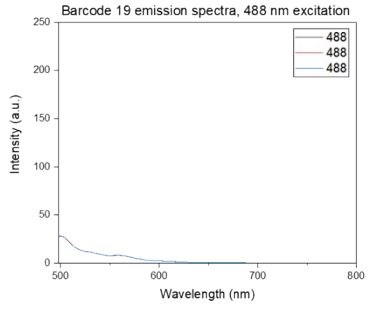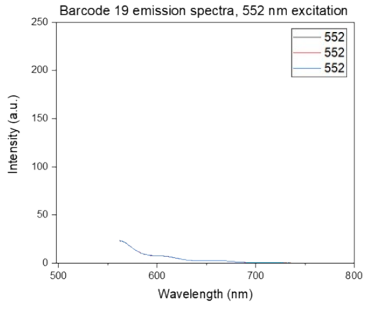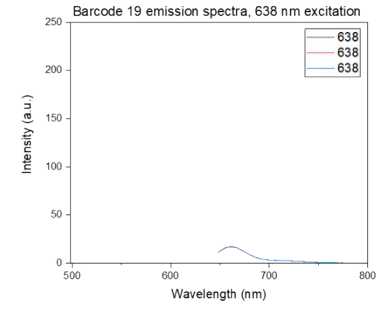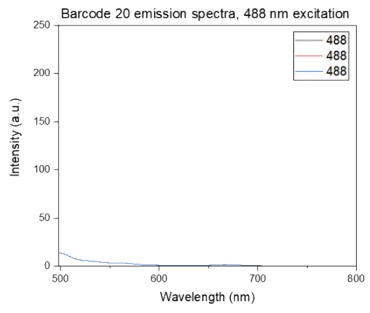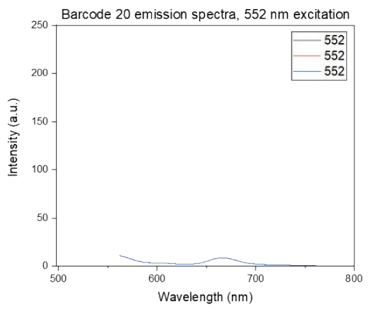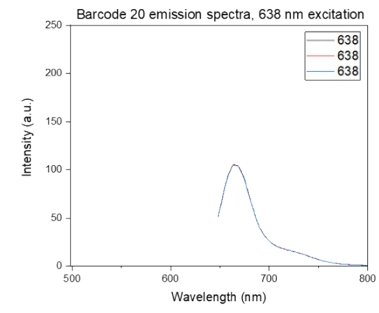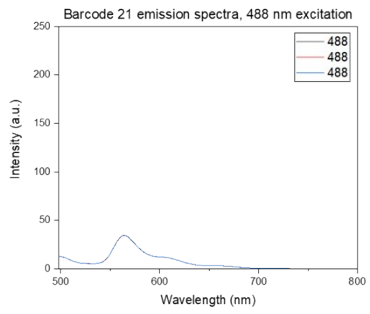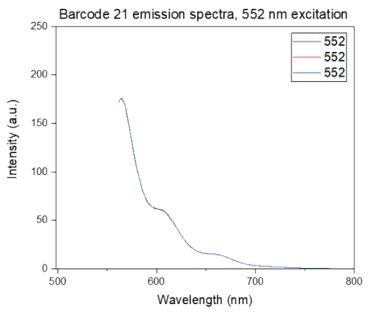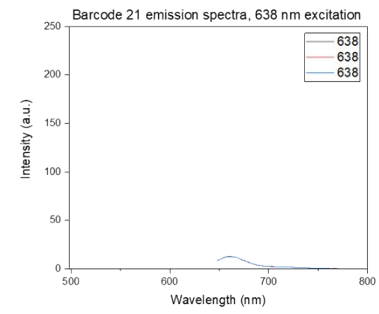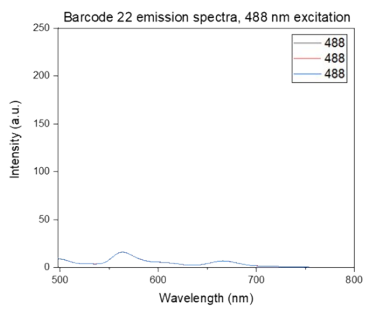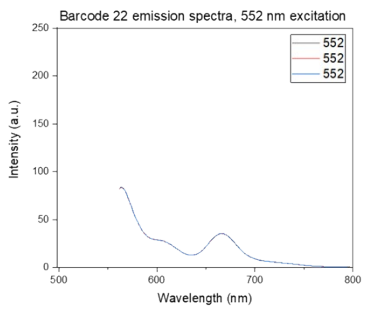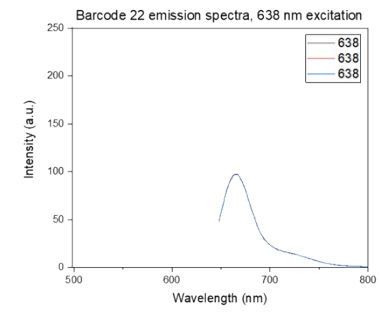



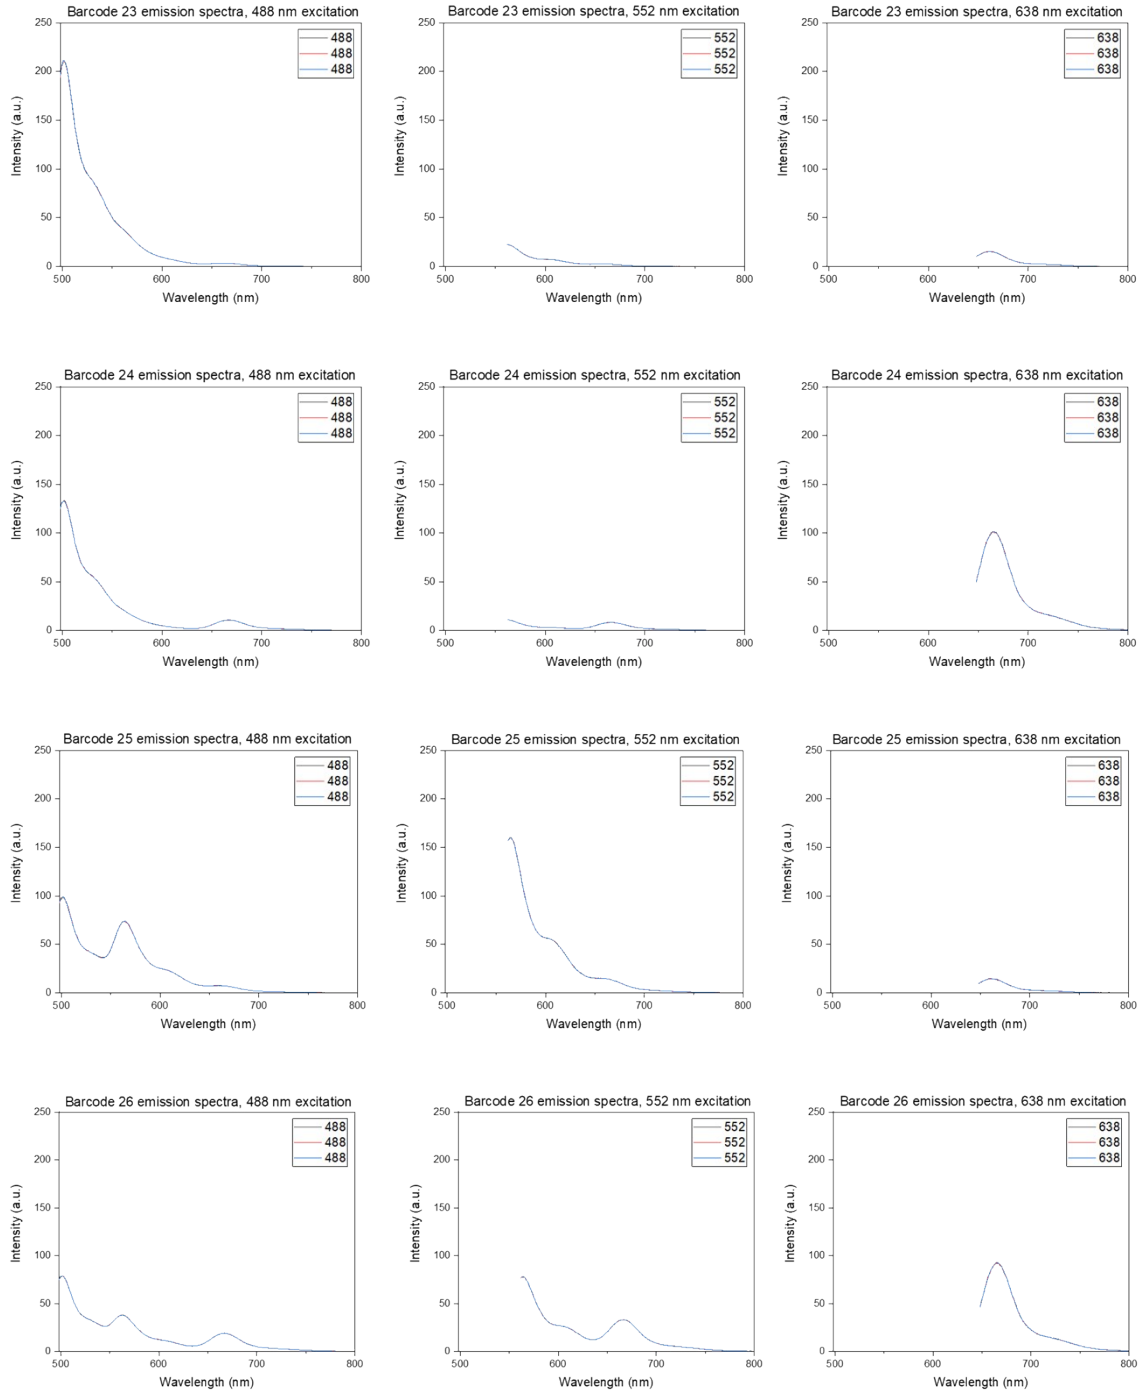

**Fig S5.** Bulk fluorescence emission spectra of 26 barcodes excited with 488, 552 and 638 nm laser lines, emission collected from 498-750 nm, 562-750 nm and 648-750 nm.

### PART 3 Single Nanoparticle optical characterization with Confocal Microscopy

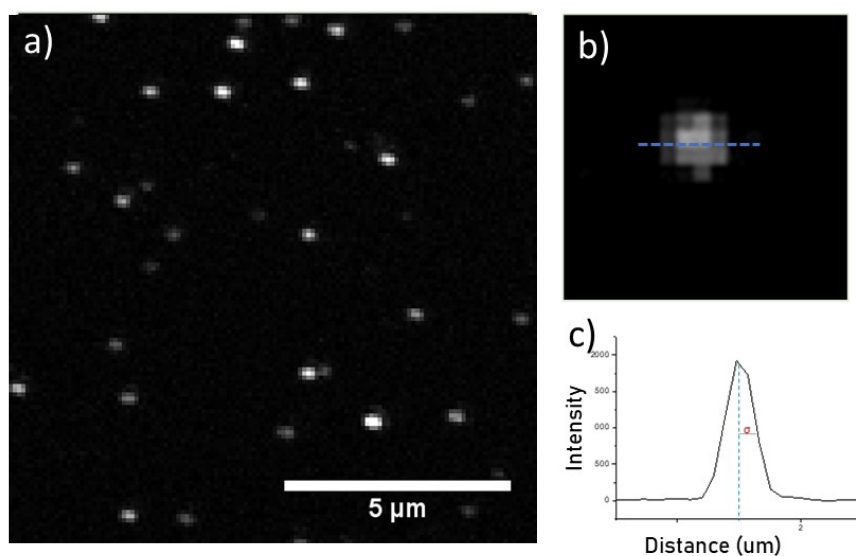

**Fig S6.** Single nanoparticle optical characterization with confocal microscopy. (a) Dil loaded Poly Lactic-co-glycol Acid – Poly ethylene glycol PLGA-PEG nanoparticles physisorbed on a glass surface at a medium to low density, (b) zoom in of one point spread function (nanoparticle) and (c) corresponding intensity profile displaying the classical gaussian-shape that is characteristic of a point spread function.

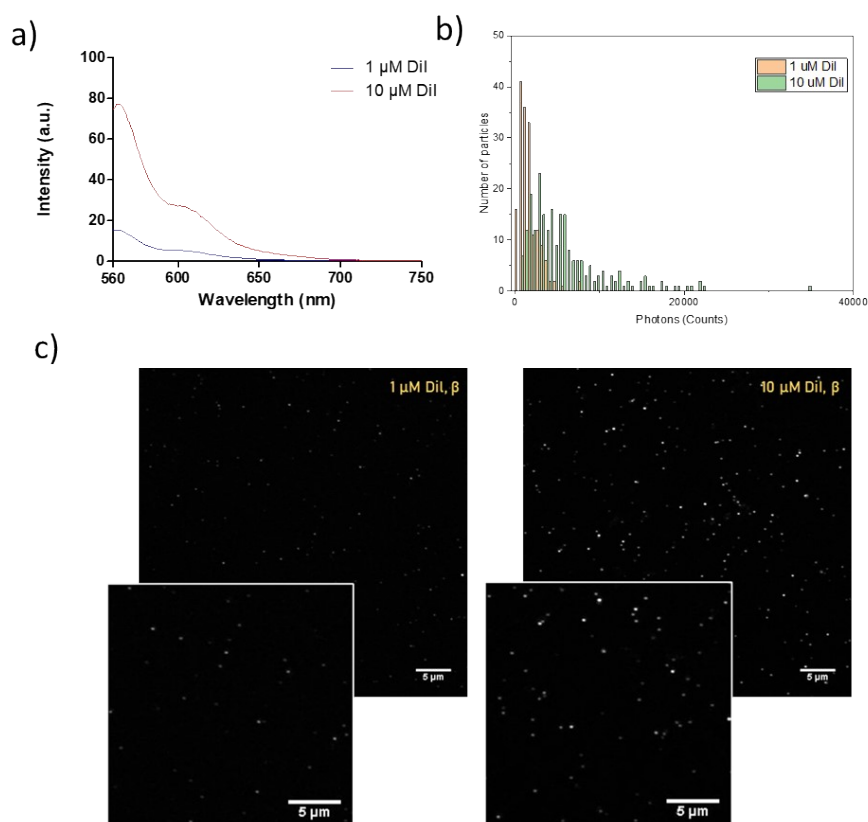

**Fig. S7.** Comparison between bulk and single-particle fluorescence intensities for two intensity levels (1, 10  $\mu\text{M}$ ) of the same color (Dil). (a) Fluorescence spectra of 1 and 10  $\mu\text{M}$  Dil particles measured with (bulk) spectrophotometry. (b) Distribution of fluorescence intensities of 1 and 10  $\mu\text{M}$  particles quantified from (c) confocal images.

## PART 4 Principal Component Analysis (PCA)

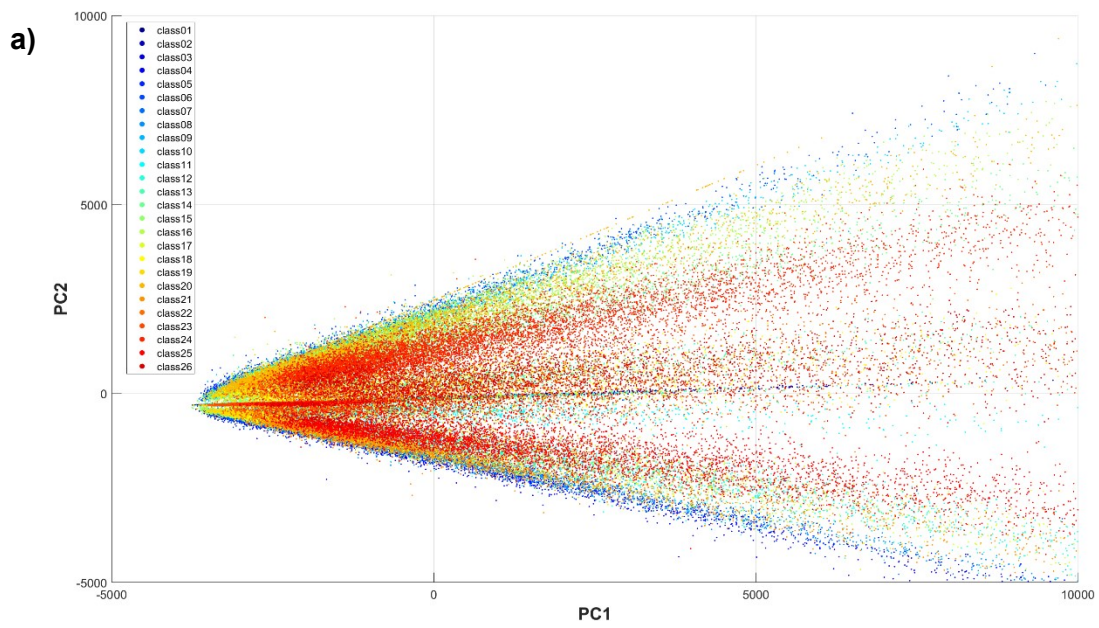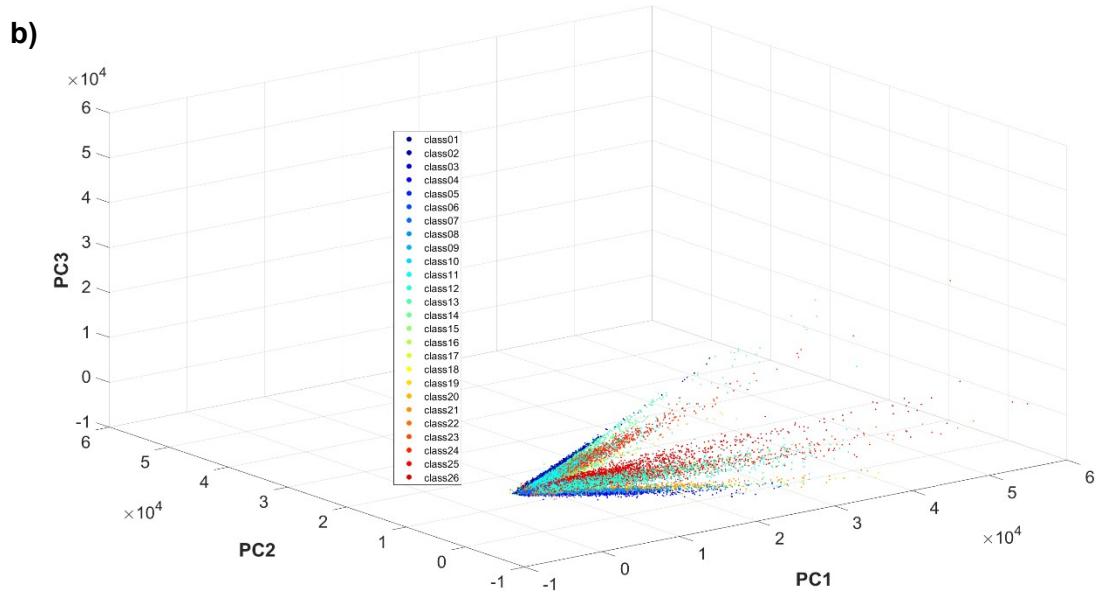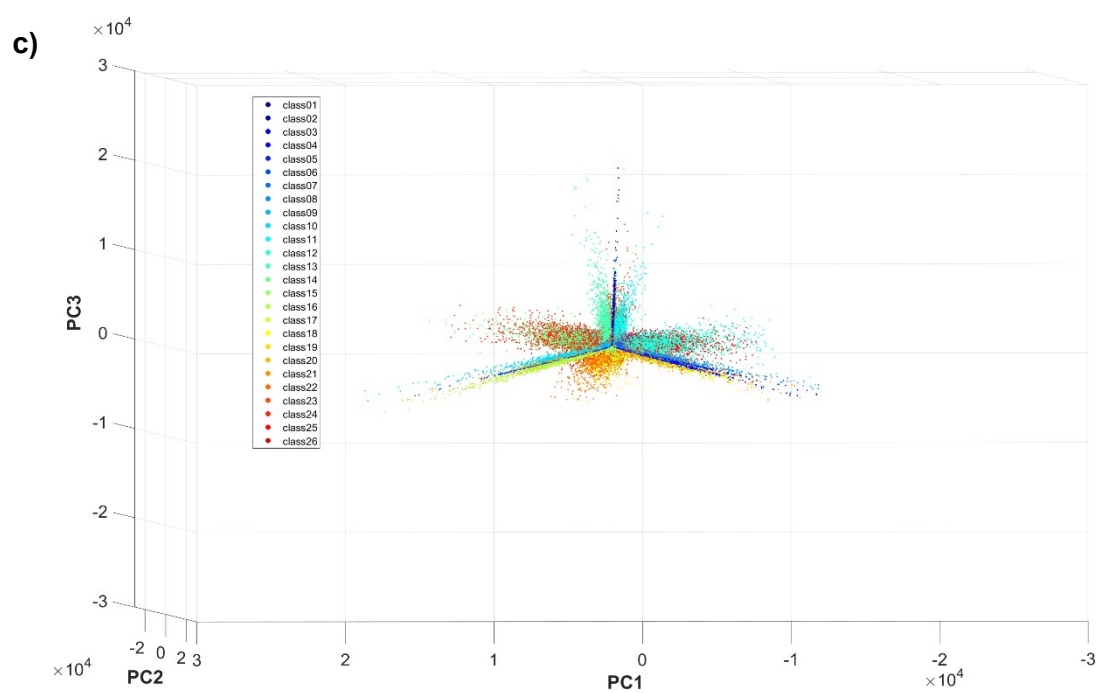

**Fig. S8.** Different perspectives of the PCA plot for barcodes 1-26. The interactive MATLAB figure can be found in <https://github.com/n4nlab/BarcodedNanoparticles>. Explained variances for each principal component (PC): PC1 = 80.4087%, PC2 = 13.0798% and PC3 = 5.6811%. (a) 2D plot, (b) 3D plot, side view. (c) 3D plot, front view.

## **PART 5      Machine learning**

**Table S2.** Overview of the unbalance in the dataset.

| <b>Barcode (class)</b> | <b>Samples</b> | <b>Barcode (class)</b> | <b>Samples</b> |
|------------------------|----------------|------------------------|----------------|
| 1                      | 2902           | 14                     | 4356           |
| 2                      | 4704           | 15                     | 2488           |
| 3                      | 3266           | 16                     | 7658           |
| 4                      | 3700           | 17                     | 3851           |
| 5                      | 1458           | 18                     | 3195           |
| 6                      | 2768           | 19                     | 2078           |
| 7                      | 2091           | 20                     | 4984           |
| 8                      | 3612           | 21                     | 4213           |
| 9                      | 2139           | 22                     | 3955           |
| 10                     | 3424           | 23                     | 4074           |
| 11                     | 3797           | 24                     | 9784           |
| 12                     | 3817           | 25                     | 6876           |
| 13                     | 4906           | 26                     | 5102           |

**Table S3.** Classifiers trained and compared in the creation of the supervised machine-learning model.

| <b>Classifier</b>                      | <b>Abbreviation</b> | <b>Type</b> |
|----------------------------------------|---------------------|-------------|
| <b>Logistic Regression</b>             | lr                  | Linear      |
| <b>K Neighbors Classifier</b>          | knn                 | Non-linear  |
| <b>Naive Bayes</b>                     | nb                  | Linear      |
| <b>Decision Tree Classifier</b>        | dt                  | Non-linear  |
| <b>SVM - Linear Kernel</b>             | svm                 | Linear      |
| <b>SVM - Radial Kernel</b>             | rbsvm               | Linear      |
| <b>MLP Classifier</b>                  | mlp                 | Non-linear  |
| <b>Ridge Classifier</b>                | ridge               | Linear      |
| <b>Random Forest Classifier</b>        | rf                  | Non-linear  |
| <b>Quadratic Discriminant Analysis</b> | qda                 | Non-linear  |
| <b>Ada Boost Classifier</b>            | ada                 | Non-linear  |
| <b>Gradient Boosting Classifier</b>    | gbc                 | Non-linear  |
| <b>Linear Discriminant Analysis</b>    | lda                 | Linear      |
| <b>Extra Trees Classifier</b>          | et                  | Non-linear  |
| <b>Light Gradient Boosting Machine</b> | lightgbm            | Non-linear  |

**Table S4.** Metrics used to assess the models and their formulas. Notations:  $n$  = number of samples;  $G$  = number of classes;  $n_g$  = number of samples belonging to the  $g$ -th class;  $n'_g$  = number of samples predicted in the  $g$ -th class;  $c_{gg}$  = number of correctly classified samples;  $c_{gk}$  = number of samples belonging to class  $g$  and predicted as belonging to class  $k$ .

| Metric                                  | Formula                                                                                                                                                                                                                                                                                                                                                                                                  |
|-----------------------------------------|----------------------------------------------------------------------------------------------------------------------------------------------------------------------------------------------------------------------------------------------------------------------------------------------------------------------------------------------------------------------------------------------------------|
| Accuracy                                | $\frac{\sum_{g=1}^G c_{gg}}{n}$                                                                                                                                                                                                                                                                                                                                                                          |
| Balanced accuracy                       | $\frac{\sum_{g=1}^G \frac{c_{gg}}{n_g}}{G}$                                                                                                                                                                                                                                                                                                                                                              |
| Sensitivity                             | $\sum_{g=1}^G \frac{c_{gg}}{n_g}$                                                                                                                                                                                                                                                                                                                                                                        |
| Average Precision                       | $\frac{\sum_{g=1}^G \frac{c_{gg}}{n'_g}}{G}$                                                                                                                                                                                                                                                                                                                                                             |
| Precision                               | $\frac{c_{gg}}{n'_g}$                                                                                                                                                                                                                                                                                                                                                                                    |
| F1 score                                | $2 \times \frac{\text{Precision} \times \text{Sensitivity}}{\text{Precision} + \text{Sensitivity}}$                                                                                                                                                                                                                                                                                                      |
| Matthew's Correlation Coefficient (MCC) | $\frac{\sum_{g=1}^G \sum_{k=1}^G \sum_{m=1}^G (c_{gg} \cdot c_{km} - c_{gk} \cdot c_{mg})}{\sqrt{\sum_{g=1}^G \left[ \left( \sum_{k=1}^G c_{gk} \right) \cdot \left( \sum_{\substack{f=1 \\ f \neq g}}^G \sum_{m=1}^G c_{fm} \right) \right]} \cdot \sqrt{\sum_{g=1}^G \left[ \left( \sum_{k=1}^G c_{kg} \right) \cdot \left( \sum_{\substack{f=1 \\ f \neq g}}^G \sum_{m=1}^G c_{fm} \right) \right]}}$ |

**Table S5.** Scores of the different classifiers trained with the full dataset of 26 barcodes, sorted by higher accuracy first. TT = Total Time. Pycaret's automatic output.

| Model                                      | Accuracy | Balanced accuracy | Average Precision | F1     | MCC    | TT (s)  |
|--------------------------------------------|----------|-------------------|-------------------|--------|--------|---------|
| MLP Classifier (mlp)                       | 0.6429   | 0.6021            | 0.6501            | 0.6346 | 0.6262 | 11.5060 |
| Random Forest Classifier (rf)              | 0.5983   | 0.5548            | 0.5950            | 0.5872 | 0.5742 | 1.5420  |
| Extra Trees Classifier (et)                | 0.5808   | 0.5398            | 0.5819            | 0.5726 | 0.5607 | 0.9150  |
| Gradient Boosting Classifier (gbc)         | 0.5785   | 0.5331            | 0.5835            | 0.5675 | 0.5586 | 56.3090 |
| Light Gradient Boosting Machine (lightgbm) | 0.5708   | 0.5311            | 0.5716            | 0.5631 | 0.5501 | 2.3770  |
| SVM – radial kernel (rbfsvm)               | 0.5643   | 0.5096            | 0.6218            | 0.5496 | 0.5466 | 36.9260 |
| Logistic Regression (lr)                   | 0.5490   | 0.5012            | 0.5725            | 0.5309 | 0.5290 | 5.5390  |
| K-neighbors Classifier (knn)               | 0.5003   | 0.4707            | 0.5099            | 0.4977 | 0.4770 | 0.7070  |
| Decision Tree Classifier (dt)              | 0.4862   | 0.4512            | 0.4890            | 0.4872 | 0.4616 | 0.1590  |
| SVM – Linear kernel (svm)                  | 0.4473   | 0.4011            | 0.4671            | 0.4200 | 0.4227 | 0.2210  |
| Linear Discriminant Analysis               | 0.4315   | 0.4094            | 0.4648            | 0.4165 | 0.4080 | 0.0470  |

| (lda)                                 |        |        |        |        |        |        |
|---------------------------------------|--------|--------|--------|--------|--------|--------|
| Ridge Classifier (ridge)              | 0.3694 | 0.2679 | 0.3194 | 0.2809 | 0.3410 | 0.1300 |
| Naïve Bayes (nb)                      | 0.3143 | 0.3239 | 0.4796 | 0.2881 | 0.2969 | 0.0290 |
| Quadratic discriminant Analysis (qda) | 0.2284 | 0.2248 | 0.2299 | 0.1929 | 0.2178 | 0.0320 |
| Ada Boost Classifier (ada)            | 0.2055 | 0.1928 | 0.2095 | 0.1530 | 0.1795 | 0.9500 |

**Table S6.** Scores of the different classifiers trained with the full dataset of 26 barcodes, sorted by higher accuracy first, using only the features extracted from the three main acquisitions channels ( $\alpha$ ,  $\beta$ ,  $\delta$ ). TT = Total Time. Pycaret's automatic output.

| Model                                      | Accuracy | Balanced accuracy | Average precision | F1     | MCC    | TT (s)  |
|--------------------------------------------|----------|-------------------|-------------------|--------|--------|---------|
| Gradient Boosting Classifier (gbc)         | 0.4215   | 0.4235            | 0.4623            | 0.4149 | 0.4008 | 8.2880  |
| Logistic Regression (lr)                   | 0.4075   | 0.4102            | 0.5843            | 0.3876 | 0.3909 | 4.7630  |
| Light Gradient Boosting Machine (lightgbm) | 0.4063   | 0.4075            | 0.4321            | 0.4033 | 0.3840 | 0.9450  |
| K-neighbors Classifier (knn)               | 0.3791   | 0.3801            | 0.4001            | 0.3779 | 0.3554 | 0.1370  |
| MLP Classifier (mlp)                       | 0.3562   | 0.3568            | 0.4428            | 0.3104 | 0.3397 | 0.7610  |
| Random Forest Classifier (rf)              | 0.3561   | 0.3544            | 0.3586            | 0.3562 | 0.3304 | 0.4640  |
| Extra Trees Classifier (et)                | 0.3504   | 0.3487            | 0.3526            | 0.3505 | 0.3244 | 0.3550  |
| Decision Tree Classifier (dt)              | 0.3325   | 0.3310            | 0.3347            | 0.3326 | 0.3058 | 0.0230  |
| Naïve Bayes (nb)                           | 0.2985   | 0.2964            | 0.4345            | 0.2460 | 0.2848 | 0.0110  |
| Linear Discriminant Analysis (lda)         | 0.2864   | 0.2826            | 0.3310            | 0.2646 | 0.2615 | 0.0120  |
| Ridge Classifier (ridge)                   | 0.2251   | 0.2218            | 0.1795            | 0.1432 | 0.2028 | 0.0080  |
| SVM – radial kernel (rbfsvm)               | 0.1626   | 0.1633            | 0.1797            | 0.1454 | 0.1428 | 26.6900 |
| SVM – Linear kernel (svm)                  | 0.1436   | 0.1426            | 0.0784            | 0.0700 | 0.1221 | 0.2010  |
| Ada Boost Classifier (ada)                 | 0.1329   | 0.1325            | 0.0682            | 0.0602 | 0.1090 | 0.3240  |
| Quadratic discriminant Analysis (qda)      | 0.0380   | 0.0385            | 0.0014            | 0.0028 | 0.0000 | 0.0070  |

**Table S7.** Scores of the different classifiers trained with the 10-class model, sorted by higher accuracy. TT = Total Time. Pycaret's automatic output.

| Model                                      | Accuracy | Balanced accuracy | Average precision | F1     | MCC    | TT (s) |
|--------------------------------------------|----------|-------------------|-------------------|--------|--------|--------|
| MLP Classifier (mlp)                       | 0.8550   | 0.8375            | 0.8572            | 0.8550 | 0.8365 | 4.3260 |
| Light Gradient Boosting Machine (lightgbm) | 0.8337   | 0.8150            | 0.8343            | 0.8332 | 0.8123 | 0.5140 |
| Random Forest Classifier (rf)              | 0.8192   | 0.7996            | 0.8200            | 0.8181 | 0.7960 | 0.4240 |
| Gradient Boosting Classifier (gbc)         | 0.8130   | 0.7940            | 0.8141            | 0.8120 | 0.7890 | 7.8200 |
| Extra Trees Classifier (et)                | 0.8126   | 0.7933            | 0.8131            | 0.8111 | 0.7885 | 0.2360 |
| SVM – radial kernel (rbfsvm)               | 0.7966   | 0.7725            | 0.8046            | 0.7950 | 0.7710 | 4.8650 |
| Logistic Regression (lr)                   | 0.7796   | 0.7572            | 0.7827            | 0.7782 | 0.7516 | 1.0870 |
| K-neighbors Classifier (knn)               | 0.7595   | 0.7372            | 0.7592            | 0.7568 | 0.7288 | 0.2130 |
| Decision Tree Classifier (dt)              | 0.7526   | 0.7328            | 0.7529            | 0.7523 | 0.7209 | 0.0530 |
| SVM – Linear kernel (svm)                  | 0.7477   | 0.7179            | 0.7549            | 0.7421 | 0.7165 | 0.0500 |
| Linear Discriminant Analysis (lda)         | 0.6877   | 0.6730            | 0.7127            | 0.6892 | 0.6504 | 0.0240 |
| Ridge Classifier (ridge)                   | 0.6448   | 0.5696            | 0.6586            | 0.6224 | 0.6004 | 0.0160 |
| Naïve Bayes (nb)                           | 0.5599   | 0.5350            | 0.6595            | 0.5130 | 0.5232 | 0.0170 |
| Ada Boost Classifier (ada)                 | 0.4969   | 0.3915            | 0.3911            | 0.3879 | 0.4437 | 0.2840 |
| Quadratic discriminant Analysis (qda)      | 0.4340   | 0.4394            | 0.2967            | 0.3397 | 0.3984 | 0.0180 |

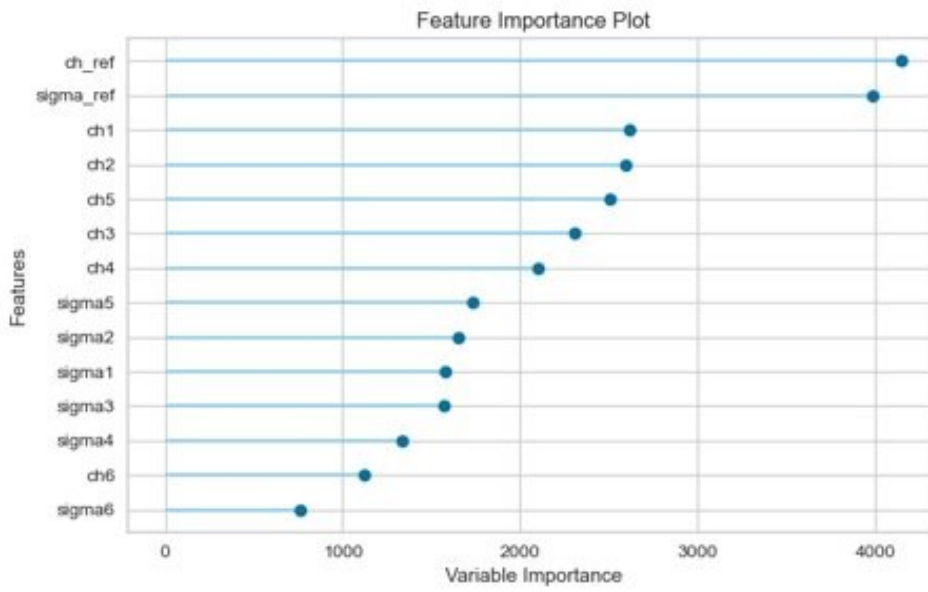

**Fig. S9.** Feature importance plot of the second-best performing model, a Light Gradient Boosting Machine. Pycaret's automatic output.

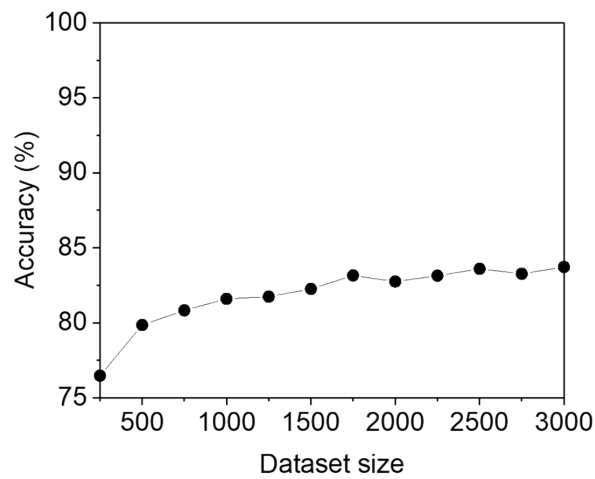

**Fig. S10.** Accuracy according to dataset size.



**Table S8.** Top-performance model, MLP classifier, hyperparameters before and after optimization. More information on these parameters can be found in Pycaret and scikit-learn's documentation. Highlighted in yellow, the hyperparameters that had changed.

| Parameter                            | Value before optimization | Value after optimization | Explanation                                                                                                                                                                                                                                                                                                                                                                                                                                                                                                                                                                            |
|--------------------------------------|---------------------------|--------------------------|----------------------------------------------------------------------------------------------------------------------------------------------------------------------------------------------------------------------------------------------------------------------------------------------------------------------------------------------------------------------------------------------------------------------------------------------------------------------------------------------------------------------------------------------------------------------------------------|
| <b>Activation function</b>           | relu                      | relu                     | Activation function for the hidden layer.                                                                                                                                                                                                                                                                                                                                                                                                                                                                                                                                              |
| <b>Alpha</b>                         | 0.0001                    | 0.001                    | Strength of the L2 regularization term. The L2 regularization term is divided by the sample size when added to the loss.                                                                                                                                                                                                                                                                                                                                                                                                                                                               |
| <b>Batch size</b>                    | Auto                      | Auto                     | Size of minibatches for stochastic optimizers.                                                                                                                                                                                                                                                                                                                                                                                                                                                                                                                                         |
| <b>Beta 1</b>                        | 0.9                       | 0.9                      | Exponential decay rate for estimates of first moment vector in adam, should be in [0, 1). Only used when solver='adam'.                                                                                                                                                                                                                                                                                                                                                                                                                                                                |
| <b>Beta 2</b>                        | 0.999                     | 0.999                    | Exponential decay rate for estimates of second moment vector in adam, should be in [0, 1). Only used when solver='adam'.                                                                                                                                                                                                                                                                                                                                                                                                                                                               |
| <b>Early stopping</b>                | False                     | False                    | Whether to use early stopping to terminate training when validation score is not improving. If set to true, it will automatically set aside 10% of training data as validation and terminate training when validation score is not improving by at least tol for n_iter_no_change consecutive epochs. The split is stratified, except in a multilabel setting. If early stopping is False, then the training stops when the training loss does not improve by more than tol for n_iter_no_change consecutive passes over the training set. Only effective when solver='sgd' or 'adam'. |
| <b>Epsilon</b>                       | 1e-08                     | 1e-08                    | Value for numerical stability in adam. Only used when solver='adam'.                                                                                                                                                                                                                                                                                                                                                                                                                                                                                                                   |
| <b>Hidden layer sizes</b>            | (100,)                    | [50,50]                  | The ith element represents the number of neurons in the ith hidden layer.                                                                                                                                                                                                                                                                                                                                                                                                                                                                                                              |
| <b>Learning rate</b>                 | Constant                  | adaptive                 | Learning rate schedule for weight updates.<br><br>'constant' is a constant learning rate given by 'learning_rate_init'.<br><br>'adaptive' keeps the learning rate constant to 'learning_rate_init' as long as training loss keeps decreasing. Each time two consecutive epochs fail to decrease training loss by at least tol, or fail to increase validation score by at least tol if 'early_stopping' is on, the current learning rate is divided by 5.                                                                                                                              |
| <b>Learning rate init</b>            | 0.001                     | 0.001                    | The initial learning rate used. It controls the step-size in updating the weights.                                                                                                                                                                                                                                                                                                                                                                                                                                                                                                     |
| <b>Max iterations</b>                | 500                       | 500                      | Maximum number of iterations. The solver iterates until convergence (determined by 'tol') or this number of iterations. For stochastic solvers ('sgd', 'adam'), note that this determines the number of epochs (how many times each data point will be used), not the number of gradient steps.                                                                                                                                                                                                                                                                                        |
| <b>Number iterations (no change)</b> | 10                        | 10                       | Maximum number of epochs to not meet tol improvement. Only effective when solver='sgd' or 'adam'.                                                                                                                                                                                                                                                                                                                                                                                                                                                                                      |
| <b>Random state</b>                  | 6971                      | 6971                     | Determines random number generation for weights and bias initialization, train-test split if early stopping is used, and batch sampling when solver='sgd' or 'adam'. Pass                                                                                                                                                                                                                                                                                                                                                                                                              |

|                   |        |        |                                                                                                                                                                                                                                             |
|-------------------|--------|--------|---------------------------------------------------------------------------------------------------------------------------------------------------------------------------------------------------------------------------------------------|
|                   |        |        | an int for reproducible results across multiple function calls.                                                                                                                                                                             |
| <b>Shuffle</b>    | True   | True   | Whether to shuffle samples in each iteration.                                                                                                                                                                                               |
| <b>Solver</b>     | adam   | adam   | The solver for weight optimization.                                                                                                                                                                                                         |
| <b>Tol</b>        | 0.0001 | 0.0001 | Tolerance for the optimization. When the loss or score is not improving by at least tol for n_iter_no_change consecutive iterations, unless learning_rate is set to 'adaptive', convergence is considered to be reached and training stops. |
| <b>Verbose</b>    | False  | False  | Whether to print progress messages to stdout.                                                                                                                                                                                               |
| <b>Warm start</b> | False  | False  | When set to True, reuse the solution of the previous call to fit as initialization, otherwise, just erase the previous solution.                                                                                                            |

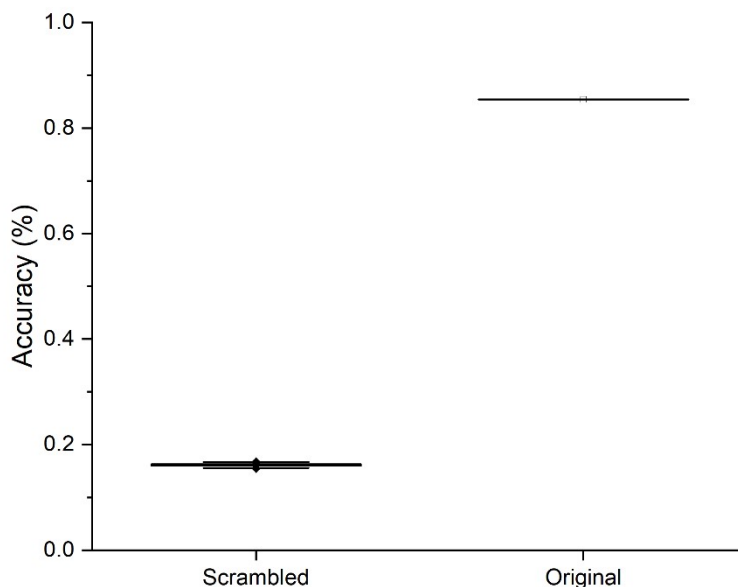

**Fig. S11.** y-scrambling analysis of the 10-class model. The analysis was performed shuffling the label column (Barcode ID) and re-training the model in 100 iterations.

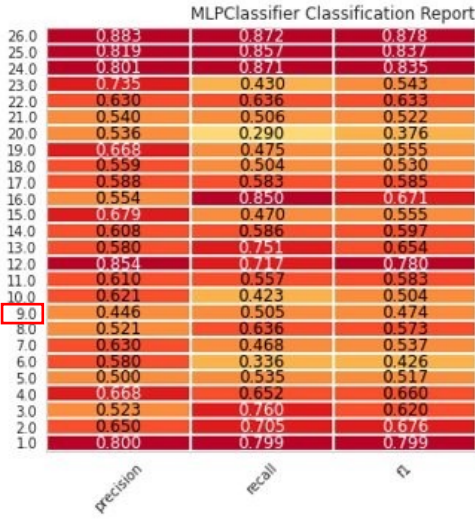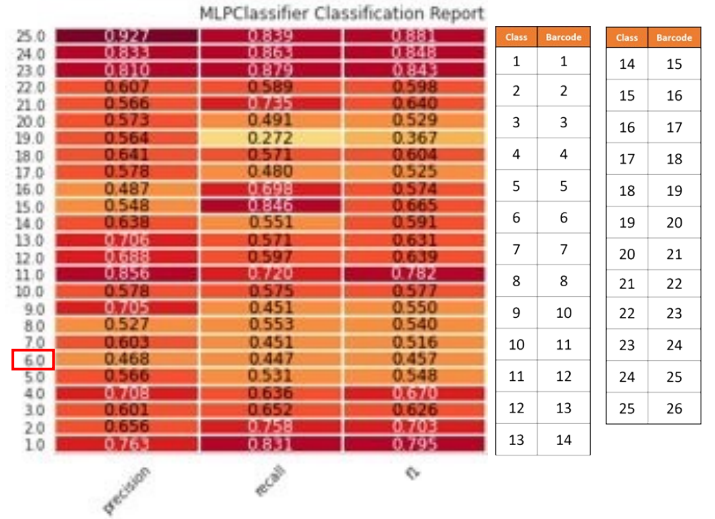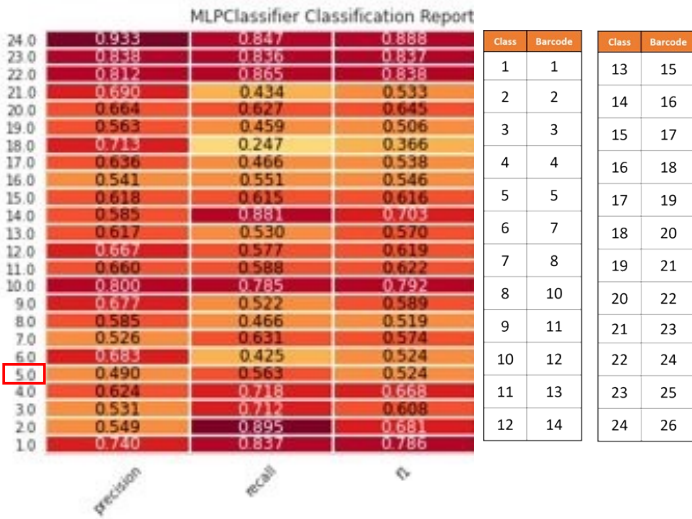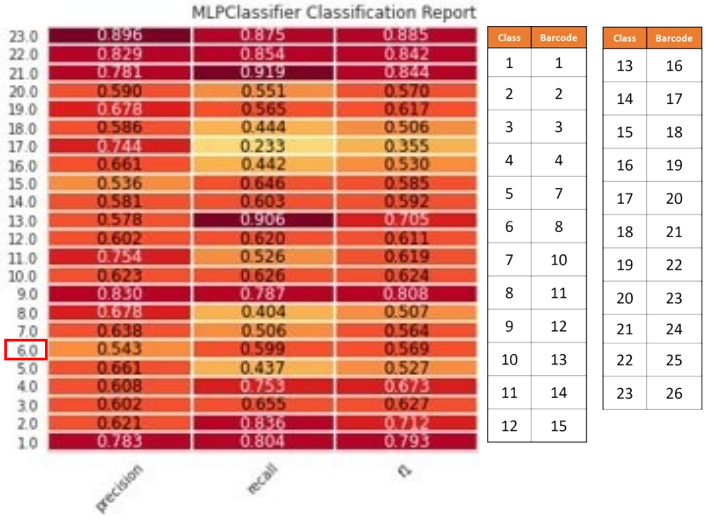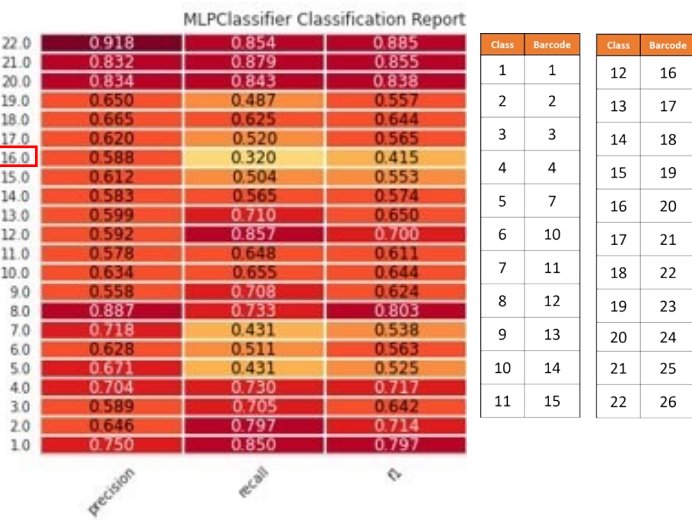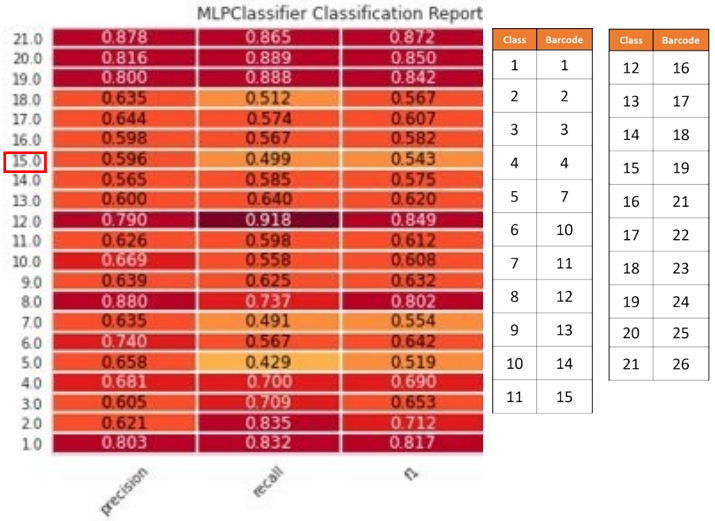

MLPClassifier Classification Report

|    | precision | recall | f1    |
|----|-----------|--------|-------|
| 19 | 0.680     | 0.583  | 0.628 |
| 18 | 0.810     | 0.750  | 0.779 |
| 17 | 0.600     | 0.505  | 0.548 |
| 16 | 0.794     | 0.554  | 0.652 |
| 15 | 0.646     | 0.556  | 0.598 |
| 14 | 0.676     | 0.751  | 0.711 |
| 13 | 0.592     | 0.773  | 0.671 |
| 12 | 0.943     | 0.833  | 0.885 |
| 11 | 0.614     | 0.860  | 0.716 |
| 10 | 0.830     | 0.871  | 0.850 |
| 9  | 0.843     | 0.832  | 0.837 |
| 8  | 0.617     | 0.568  | 0.592 |
| 7  | 0.653     | 0.581  | 0.615 |
| 6  | 0.624     | 0.580  | 0.601 |
| 5  | 0.620     | 0.601  | 0.611 |
| 4  | 0.605     | 0.698  | 0.648 |
| 3  | 0.778     | 0.926  | 0.846 |
| 2  | 0.690     | 0.592  | 0.637 |
| 1  | 0.681     | 0.611  | 0.644 |
| 0  | 0.850     | 0.804  | 0.826 |

| Class | Barcode | Class | Barcode |
|-------|---------|-------|---------|
| 0     | 1       | 10    | 15      |
| 1     | 2       | 11    | 16      |
| 2     | 3       | 12    | 17      |
| 3     | 4       | 13    | 18      |
| 4     | 7       | 14    | 21      |
| 5     | 10      | 15    | 22      |
| 6     | 11      | 16    | 23      |
| 7     | 12      | 17    | 24      |
| 8     | 13      | 18    | 25      |
| 9     | 14      | 19    | 26      |

MLPClassifier Classification Report

|    | precision | recall | f1    |
|----|-----------|--------|-------|
| 18 | 0.665     | 0.592  | 0.626 |
| 17 | 0.826     | 0.751  | 0.787 |
| 16 | 0.598     | 0.553  | 0.574 |
| 15 | 0.714     | 0.640  | 0.675 |
| 14 | 0.650     | 0.566  | 0.605 |
| 13 | 0.680     | 0.749  | 0.713 |
| 12 | 0.551     | 0.779  | 0.646 |
| 11 | 0.602     | 0.844  | 0.703 |
| 10 | 0.888     | 0.907  | 0.897 |
| 9  | 0.808     | 0.864  | 0.835 |
| 8  | 0.650     | 0.546  | 0.594 |
| 7  | 0.621     | 0.645  | 0.633 |
| 6  | 0.579     | 0.519  | 0.547 |
| 5  | 0.619     | 0.505  | 0.556 |
| 4  | 0.680     | 0.585  | 0.629 |
| 3  | 0.831     | 0.869  | 0.850 |
| 2  | 0.692     | 0.587  | 0.635 |
| 1  | 0.893     | 0.864  | 0.879 |
| 0  | 0.847     | 0.779  | 0.811 |

| Class | Barcode | Class | Barcode |
|-------|---------|-------|---------|
| 0     | 1       | 10    | 15      |
| 1     | 2       | 11    | 16      |
| 2     | 3       | 12    | 17      |
| 3     | 4       | 13    | 18      |
| 4     | 7       | 14    | 21      |
| 5     | 10      | 15    | 22      |
| 6     | 11      | 16    | 23      |
| 7     | 12      | 17    | 25      |
| 8     | 13      | 18    | 26      |
| 9     | 14      |       |         |

MLPClassifier Classification Report

|    | precision | recall | f1    |
|----|-----------|--------|-------|
| 17 | 0.911     | 0.847  | 0.878 |
| 16 | 0.672     | 0.651  | 0.661 |
| 15 | 0.806     | 0.768  | 0.787 |
| 14 | 0.835     | 0.533  | 0.651 |
| 13 | 0.735     | 0.494  | 0.591 |
| 12 | 0.664     | 0.780  | 0.717 |
| 11 | 0.609     | 0.765  | 0.678 |
| 10 | 0.673     | 0.791  | 0.727 |
| 9  | 0.905     | 0.896  | 0.901 |
| 8  | 0.828     | 0.859  | 0.843 |
| 7  | 0.750     | 0.723  | 0.736 |
| 6  | 0.631     | 0.665  | 0.647 |
| 5  | 0.604     | 0.553  | 0.577 |
| 4  | 0.602     | 0.488  | 0.539 |
| 3  | 0.661     | 0.627  | 0.644 |
| 2  | 0.783     | 0.930  | 0.850 |
| 1  | 0.659     | 0.641  | 0.650 |
| 0  | 0.852     | 0.780  | 0.814 |

| Class | Barcode | Class | Barcode |
|-------|---------|-------|---------|
| 0     | 1       | 9     | 15      |
| 1     | 2       | 10    | 16      |
| 2     | 3       | 11    | 17      |
| 3     | 4       | 12    | 18      |
| 4     | 7       | 13    | 21      |
| 5     | 10      | 14    | 22      |
| 6     | 12      | 15    | 23      |
| 7     | 13      | 16    | 25      |
| 8     | 14      | 17    | 26      |

MLPClassifier Classification Report

|    | precision | recall | f1    |
|----|-----------|--------|-------|
| 16 | 0.716     | 0.617  | 0.663 |
| 15 | 0.907     | 0.854  | 0.880 |
| 14 | 0.685     | 0.712  | 0.698 |
| 13 | 0.834     | 0.803  | 0.818 |
| 12 | 0.806     | 0.523  | 0.634 |
| 11 | 0.681     | 0.751  | 0.714 |
| 10 | 0.679     | 0.739  | 0.708 |
| 9  | 0.691     | 0.809  | 0.745 |
| 8  | 0.887     | 0.885  | 0.886 |
| 7  | 0.876     | 0.838  | 0.857 |
| 6  | 0.821     | 0.710  | 0.761 |
| 5  | 0.637     | 0.626  | 0.632 |
| 4  | 0.620     | 0.517  | 0.563 |
| 3  | 0.596     | 0.556  | 0.575 |
| 2  | 0.604     | 0.734  | 0.663 |
| 1  | 0.776     | 0.934  | 0.848 |
| 0  | 0.875     | 0.778  | 0.824 |

| Class | Barcode | Class | Barcode |
|-------|---------|-------|---------|
| 0     | 1       | 9     | 16      |
| 1     | 2       | 10    | 17      |
| 2     | 3       | 11    | 18      |
| 3     | 4       | 12    | 21      |
| 4     | 10      | 13    | 22      |
| 5     | 12      | 14    | 23      |
| 6     | 13      | 15    | 25      |
| 7     | 14      | 16    | 26      |
| 8     | 15      |       |         |

MLPClassifier Classification Report

|    | precision | recall | f1    |
|----|-----------|--------|-------|
| 15 | 0.912     | 0.968  | 0.939 |
| 14 | 0.682     | 0.619  | 0.649 |
| 13 | 0.936     | 0.860  | 0.896 |
| 12 | 0.702     | 0.672  | 0.687 |
| 11 | 0.851     | 0.734  | 0.788 |
| 10 | 0.788     | 0.667  | 0.723 |
| 9  | 0.640     | 0.781  | 0.704 |
| 8  | 0.672     | 0.801  | 0.731 |
| 7  | 0.921     | 0.899  | 0.910 |
| 6  | 0.824     | 0.899  | 0.860 |
| 5  | 0.789     | 0.692  | 0.738 |
| 4  | 0.655     | 0.616  | 0.635 |
| 3  | 0.611     | 0.593  | 0.602 |
| 2  | 0.565     | 0.533  | 0.548 |
| 1  | 0.610     | 0.690  | 0.647 |
| 0  | 0.863     | 0.823  | 0.843 |

| Class | Barcode | Class | Barcode |
|-------|---------|-------|---------|
| 0     | 1       | 8     | 16      |
| 1     | 2       | 9     | 17      |
| 2     | 3       | 10    | 18      |
| 3     | 4       | 11    | 21      |
| 4     | 12      | 12    | 22      |
| 5     | 13      | 13    | 23      |
| 6     | 14      | 14    | 25      |
| 7     | 15      | 15    | 26      |

MLPClassifier Classification Report

|    | precision | recall | f1    |
|----|-----------|--------|-------|
| 14 | 0.628     | 0.709  | 0.666 |
| 13 | 0.906     | 0.973  | 0.938 |
| 12 | 0.766     | 0.745  | 0.756 |
| 11 | 0.894     | 0.894  | 0.894 |
| 10 | 0.728     | 0.623  | 0.672 |
| 9  | 0.870     | 0.777  | 0.821 |
| 8  | 0.762     | 0.737  | 0.749 |
| 7  | 0.652     | 0.893  | 0.753 |
| 6  | 0.926     | 0.882  | 0.904 |
| 5  | 0.844     | 0.886  | 0.865 |
| 4  | 0.847     | 0.665  | 0.745 |
| 3  | 0.629     | 0.650  | 0.639 |
| 2  | 0.610     | 0.590  | 0.600 |
| 1  | 0.609     | 0.527  | 0.565 |
| 0  | 0.911     | 0.819  | 0.863 |

| Class | Barcode | Class | Barcode |
|-------|---------|-------|---------|
| 0     | 1       | 8     | 17      |
| 1     | 2       | 9     | 18      |
| 2     | 4       | 10    | 21      |
| 3     | 12      | 11    | 22      |
| 4     | 13      | 12    | 23      |
| 5     | 14      | 13    | 25      |
| 6     | 15      | 14    | 26      |
| 7     | 16      |       |         |

MLPClassifier Classification Report

|    | precision | recall | f1    | Class | Barcode | Class | Barcode |
|----|-----------|--------|-------|-------|---------|-------|---------|
| 15 | 0.622     | 0.468  | 0.534 | 0     | 1       | 7     | 17      |
| 12 | 0.668     | 0.679  | 0.674 | 1     | 4       | 8     | 18      |
| 11 | 0.905     | 0.976  | 0.939 | 2     | 12      | 9     | 21      |
| 10 | 0.750     | 0.770  | 0.760 | 3     | 13      | 10    | 22      |
| 9  | 0.921     | 0.868  | 0.894 | 4     | 14      | 11    | 23      |
| 8  | 0.801     | 0.859  | 0.829 | 5     | 15      | 12    | 25      |
| 7  | 0.822     | 0.774  | 0.798 | 6     | 16      | 13    | 26      |
| 6  | 0.707     | 0.837  | 0.767 |       |         |       |         |
| 5  | 0.903     | 0.904  | 0.904 |       |         |       |         |
| 4  | 0.860     | 0.855  | 0.857 |       |         |       |         |
| 3  | 0.801     | 0.750  | 0.775 |       |         |       |         |
| 2  | 0.641     | 0.703  | 0.671 |       |         |       |         |
| 1  | 0.646     | 0.566  | 0.603 |       |         |       |         |
| 0  | 0.884     | 0.865  | 0.875 |       |         |       |         |

MLPClassifier Classification Report

|    | precision | recall | f1    | Class | Barcode | Class | Barcode |
|----|-----------|--------|-------|-------|---------|-------|---------|
| 12 | 0.637     | 0.480  | 0.548 | 0     | 1       | 7     | 17      |
| 11 | 0.644     | 0.674  | 0.658 | 1     | 4       | 8     | 18      |
| 10 | 0.893     | 0.976  | 0.933 | 2     | 12      | 9     | 21      |
| 9  | 0.816     | 0.677  | 0.740 | 3     | 13      | 10    | 22      |
| 8  | 0.924     | 0.881  | 0.902 | 4     | 14      | 11    | 23      |
| 7  | 0.758     | 0.912  | 0.828 | 5     | 15      | 12    | 25      |
| 6  | 0.843     | 0.742  | 0.789 | 6     | 16      |       |         |
| 5  | 0.803     | 0.629  | 0.706 |       |         |       |         |
| 4  | 0.838     | 0.913  | 0.874 |       |         |       |         |
| 3  | 0.844     | 0.681  | 0.753 |       |         |       |         |
| 2  | 0.643     | 0.773  | 0.702 |       |         |       |         |
| 1  | 0.572     | 0.631  | 0.600 |       |         |       |         |
| 0  | 0.922     | 0.850  | 0.885 |       |         |       |         |

MLPClassifier Classification Report

|    | precision | recall | f1    | Class | Barcode | Class | Barcode |
|----|-----------|--------|-------|-------|---------|-------|---------|
| 11 | 0.644     | 0.762  | 0.698 | 0     | 1       | 6     | 17      |
| 10 | 0.634     | 0.495  | 0.556 | 1     | 12      | 7     | 18      |
| 9  | 0.739     | 0.673  | 0.704 | 2     | 13      | 8     | 21      |
| 8  | 0.914     | 0.960  | 0.937 | 3     | 14      | 9     | 22      |
| 7  | 0.799     | 0.747  | 0.772 | 4     | 15      | 10    | 23      |
| 6  | 0.929     | 0.879  | 0.903 | 5     | 16      | 11    | 25      |
| 5  | 0.785     | 0.913  | 0.845 |       |         |       |         |
| 4  | 0.778     | 0.830  | 0.804 |       |         |       |         |
| 3  | 0.899     | 0.829  | 0.863 |       |         |       |         |
| 2  | 0.868     | 0.709  | 0.780 |       |         |       |         |
| 1  | 0.685     | 0.766  | 0.723 |       |         |       |         |
| 0  | 0.892     | 0.889  | 0.891 |       |         |       |         |

MLPClassifier Classification Report

|    | precision | recall | f1    | Class | Barcode | Class | Barcode |
|----|-----------|--------|-------|-------|---------|-------|---------|
| 10 | 0.685     | 0.663  | 0.674 | 0     | 1       | 6     | 17      |
| 9  | 0.652     | 0.535  | 0.588 | 1     | 12      | 7     | 18      |
| 8  | 0.709     | 0.733  | 0.721 | 2     | 13      | 8     | 21      |
| 7  | 0.946     | 0.958  | 0.952 | 3     | 14      | 9     | 22      |
| 6  | 0.752     | 0.837  | 0.792 | 4     | 15      | 10    | 25      |
| 5  | 0.912     | 0.916  | 0.914 | 5     | 16      |       |         |
| 4  | 0.887     | 0.949  | 0.917 |       |         |       |         |
| 3  | 0.806     | 0.822  | 0.814 |       |         |       |         |
| 2  | 0.873     | 0.878  | 0.876 |       |         |       |         |
| 1  | 0.721     | 0.712  | 0.717 |       |         |       |         |
| 0  | 0.952     | 0.881  | 0.915 |       |         |       |         |

MLPClassifier Classification Report

|   | precision | recall | f1    | Class | Barcode | Class | Barcode |
|---|-----------|--------|-------|-------|---------|-------|---------|
| 9 | 0.648     | 0.720  | 0.682 | 0     | 1       | 5     | 16      |
| 8 | 0.878     | 0.735  | 0.800 | 1     | 12      | 6     | 17      |
| 7 | 0.767     | 0.667  | 0.713 | 2     | 13      | 7     | 18      |
| 6 | 0.922     | 0.970  | 0.946 | 3     | 14      | 8     | 21      |
| 5 | 0.764     | 0.846  | 0.803 | 4     | 15      | 9     | 25      |
| 4 | 0.934     | 0.930  | 0.932 |       |         |       |         |
| 3 | 0.906     | 0.934  | 0.920 |       |         |       |         |
| 2 | 0.856     | 0.796  | 0.825 |       |         |       |         |
| 1 | 0.866     | 0.891  | 0.878 |       |         |       |         |
| 0 | 0.929     | 0.889  | 0.909 |       |         |       |         |

MLPClassifier Classification Report

|   | precision | recall | f1    | Class | Barcode | Class | Barcode |
|---|-----------|--------|-------|-------|---------|-------|---------|
| 8 | 0.742     | 0.756  | 0.749 | 0     | 1       | 5     | 16      |
| 7 | 0.830     | 0.759  | 0.793 | 1     | 12      | 6     | 17      |
| 6 | 0.712     | 0.725  | 0.719 | 2     | 13      | 7     | 18      |
| 5 | 0.909     | 0.973  | 0.940 | 3     | 14      | 8     | 21      |
| 4 | 0.795     | 0.788  | 0.792 | 4     | 15      |       |         |
| 3 | 0.959     | 0.884  | 0.920 |       |         |       |         |
| 2 | 0.901     | 0.942  | 0.921 |       |         |       |         |
| 1 | 0.953     | 0.924  | 0.938 |       |         |       |         |
| 0 | 0.930     | 0.877  | 0.903 |       |         |       |         |

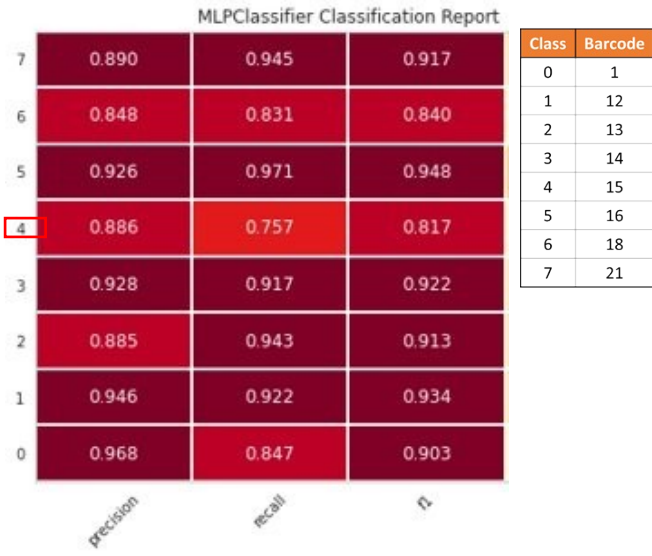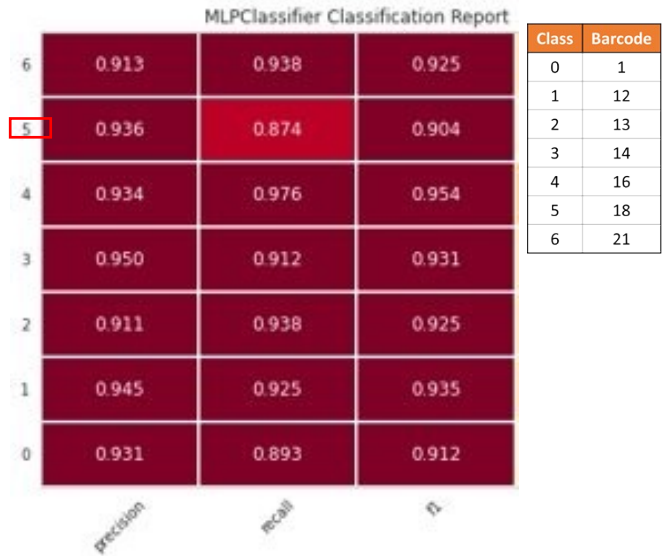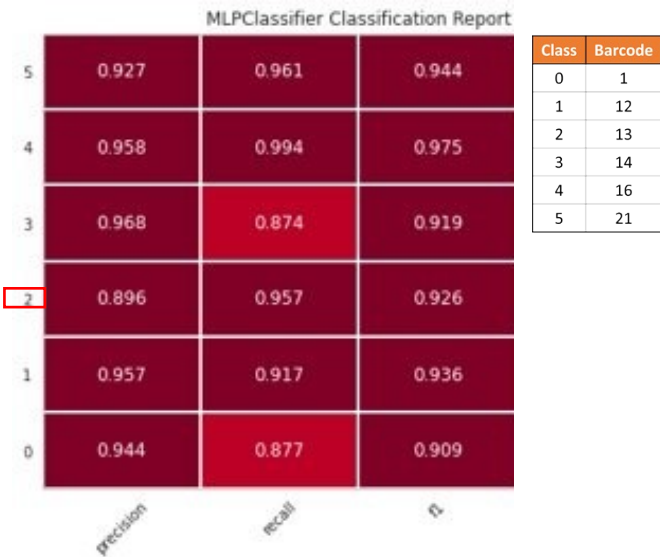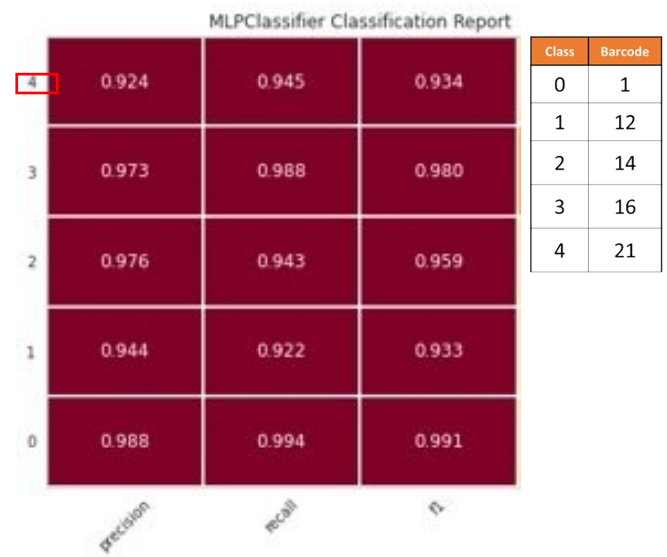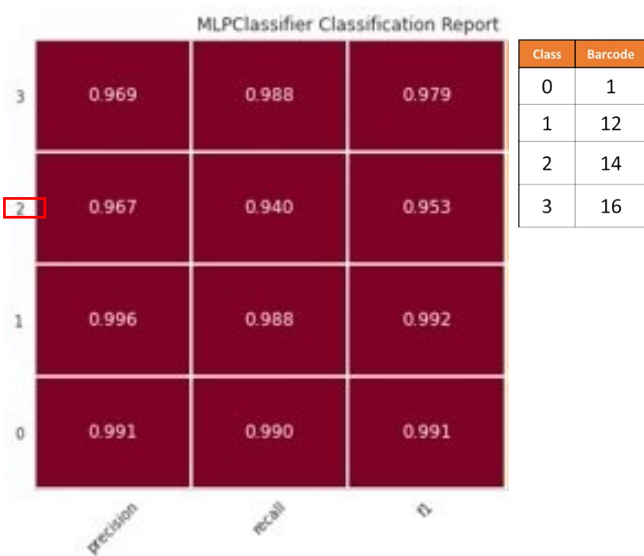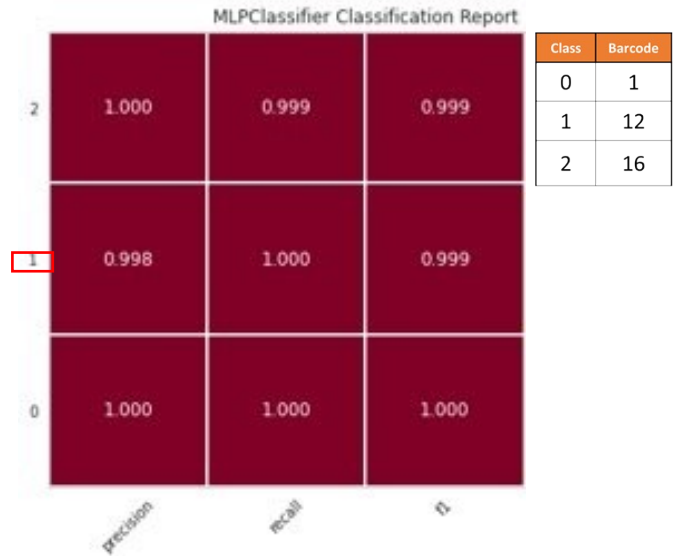

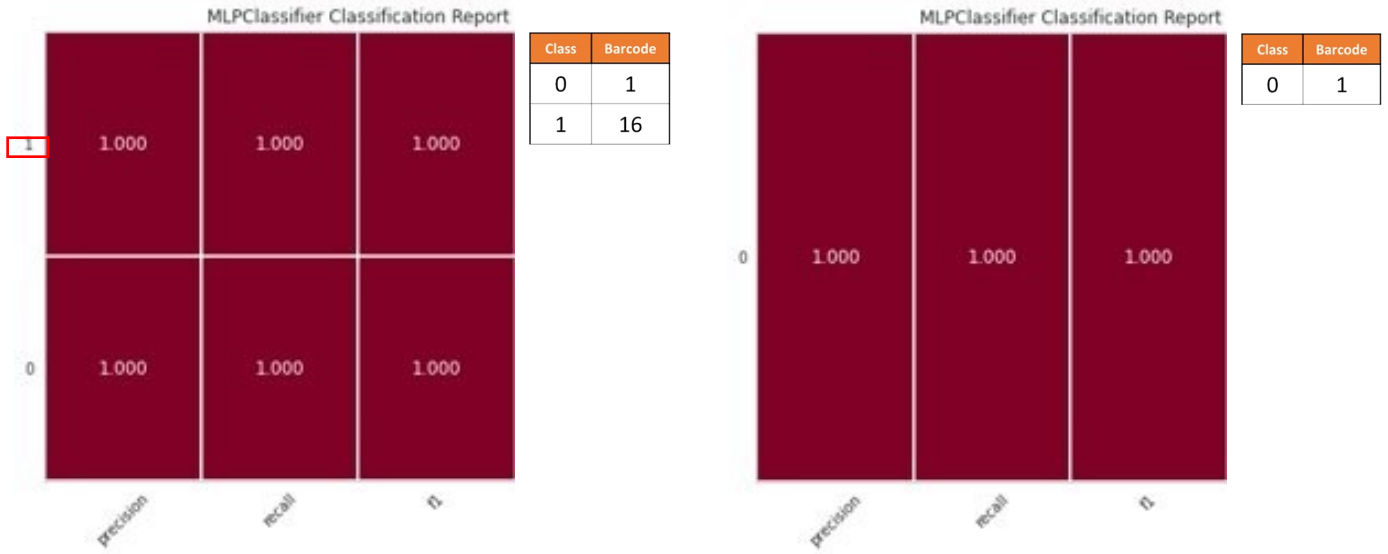

**Fig. S12.** Metrics per class for each of the 26 models trained to study the trade-off between accuracy and number of classes. Next to them, the correspondence between the class and the barcode they represent. Recall is synonym to sensitivity.

**Table S9.** Model stability analysis. Performing the random splits (80% training - 20% testing) over 5 iterations on the same dataset generates 5 10-classes models. The average precision and sensitivity on predictions made using the training and testing sets are given below. This way the models stability and any potential overfitting are assessed.

| Barcode ID |                   | Training set |      | Testing set |      |
|------------|-------------------|--------------|------|-------------|------|
|            |                   | Mean         | SD   | Mean        | SD   |
| 1          | Precision         | 0.94         | 0.01 | 0.92        | 0.01 |
|            | Sensitivity       | 0.93         | 0.02 | 0.93        | 0.02 |
| 12         | Precision         | 0.88         | 0.02 | 0.83        | 0.02 |
|            | Sensitivity       | 0.89         | 0.02 | 0.87        | 0.01 |
| 13         | Precision         | 0.89         | 0.02 | 0.90        | 0.02 |
|            | Sensitivity       | 0.93         | 0.02 | 0.91        | 0.01 |
| 14         | Precision         | 0.96         | 0.01 | 0.97        | 0.01 |
|            | Sensitivity       | 0.91         | 0.02 | 0.88        | 0.02 |
| 15         | Precision         | 0.82         | 0.04 | 0.82        | 0.03 |
|            | Sensitivity       | 0.84         | 0.02 | 0.85        | 0.02 |
| 16         | Precision         | 0.90         | 0.01 | 0.89        | 0.01 |
|            | Sensitivity       | 0.94         | 0.01 | 0.94        | 0.01 |
| 17         | Precision         | 0.72         | 0.02 | 0.69        | 0.02 |
|            | Sensitivity       | 0.81         | 0.03 | 0.75        | 0.03 |
| 18         | Precision         | 0.83         | 0.02 | 0.83        | 0.02 |
|            | Sensitivity       | 0.80         | 0.04 | 0.79        | 0.02 |
| 21         | Precision         | 0.74         | 0.02 | 0.73        | 0.02 |
|            | Sensitivity       | 0.67         | 0.05 | 0.68        | 0.05 |
| 25         | Precision         | 0.91         | 0.03 | 0.86        | 0.03 |
|            | Sensitivity       | 0.85         | 0.03 | 0.81        | 0.03 |
| Global     | Balanced accuracy | 0.86         | 0.03 | 0.84        | 0.00 |
